# Supplementary material for: Triply-bonded indiumphosphorus molecules: theoretical designs and characterization
Source: Royal Society of Chemistry journal article supplement (doi:10.1039/c7ra01295k), 2017-01-01
Supplement: c7ra01295k1.pdf [file c7ra01295k1.pdf]

# Supporting Information

## Triply-bonded Indium≡Phosphorus Molecules: Theoretical Designs and Characterization

Jia-Syun Lu,<sup>1</sup> Ming-Chung Yang,<sup>1</sup> and Ming-Der Su<sup>1,2\*</sup>

<sup>1</sup>Department of Applied Chemistry, National Chiayi University, Chiayi 60004,  
Taiwan

<sup>2</sup>Department of Medicinal and Applied Chemistry, Kaohsiung Medical University,  
Kaohsiung 80708, Taiwan

\*Email: [midesu@mail.ncyu.edu.tw](mailto:midesu@mail.ncyu.edu.tw)

### Table of Contents:

|                                        |    |
|----------------------------------------|----|
| Theoretical Methods                    | S2 |
| References                             | S3 |
| Figure S1 (R' = SiPrDis <sub>2</sub> ) | S5 |
| Figure S2 (R' = NHC)                   | S6 |
| Cartesian Coordinates                  | S7 |

## Theoretical Methods

Using the Gaussian 09 program package,<sup>1</sup> all geometries are fully optimized using hybrid density functional theory at the M06-2X,<sup>2</sup> B3LYP,<sup>3,4</sup> and B3PW91<sup>4,5</sup> levels, in conjunction with the Def2-TZVP<sup>6</sup> and LANL2DZ+dp<sup>7</sup> basis sets. These DFT calculations are signified as M06-2X/Def2-TZVP, B3PW91/Def2-TZVP and B3LYP/LANL2DZ+dp, respectively. In order to confirm that the reactants and products have no imaginary frequencies and that the transition states possess only one imaginary frequency, frequency calculations were performed for all structures. Thermodynamic corrections to 298 K, heat capacity corrections and entropy corrections ( $\Delta S$ ) are applied to the three levels of DFT. The relative free energy ( $\Delta G$ ) at 298 K is also computed at the same levels of theory.

Next,  $\text{SiMe}(\text{Si}t\text{Bu}_3)_2\text{-In}\equiv\text{P-SiMe}(\text{Si}t\text{Bu}_3)_2$ ,  $\text{Si}i\text{PrDis}_2\text{-In}\equiv\text{P-Si}i\text{PrDis}_2$ , and  $\text{NHC-In}\equiv\text{P-NHC}$  are the model reactants for this study. It is known that the B3LYP functional fails to describe nonvalent interactions, such as the London dispersion correctly. As a result, for large ligands, calculations were performed using dispersion-corrected B97-D3 method.<sup>8-10</sup> Because of the limitations of the available memory size and CPU time, frequencies are not computed at the B97-D3/LANL2DZ+dp level of theory for the triply bonded  $\text{R}'\text{In}\equiv\text{PR}'$  systems that have bulky ligands ( $\text{R}'$ ), so the zero-point energies and the Gibbs free energies that are derived using B97-D3/LANL2DZ+dp cannot be used for these systems.

## References:

- (1) Frisch, M. J.; Trucks, G. W.; Schlegel, H. B.; Scuseria, G. E.; Robb, M. A.; Cheeseman, J. R.; Scalmani, G.; Barone, V.; Mennucci, B.; Petersson, G. A.; Nakatsuji, H.; Caricato, M.; Li, X.; Hratchian, H. P.; Izmaylov, A. F.; Bloino, J.; Zheng, G.; Sonnenberg, J. L.; Hada, M.; Ehara, M.; Toyota, K.; Fukuda, R.; Hasegawa, J.; Ishida, M.; Nakajima, T.; Honda, Y.; Kitao, O.; Nakai, H.; Vreven, T.; Montgomery, Jr., J. A.; Peralta, J. E.; Ogliaro, F.; Bearpark, M.; Heyd, J. J.; Brothers, E.; Kudin, K. N.; Staroverov, V. N.; Keith, T.; Kobayashi, R.; Normand, J.; Raghavachari, K.; Rendell, A.; Burant, J. C.; Iyengar, S. S.; Tomasi, J.; Cossi, M.; Rega, N.; Millam, J. M.; Klene, M.; Knox, J. E.; Cross, J. B.; Bakken, V.; Adamo, C.; Jaramillo, J.; Gomperts, R.; Stratmann, R. E.; Yazyev, O.; Austin, A. J.; Cammi, R.; Pomelli, C.; Ochterski, J. W.; Martin, R. L.; Morokuma, K.; Zakrzewski, V. G.; Voth, G. A.; Salvador, P.; Dannenberg, J. J.; Dapprich, S.; Daniels, A. D.; Farkas, O.; Foresman, J. B.; Ortiz, J. V.; Cioslowski, J. and Fox, D. J. *Gaussian, Inc.*, Wallingford CT, 2013.
- (2) Zhao, Y.; Truhlar, D. G. *Acc. Chem. Res.* **2008**, *41*, 157-167.
- (3) (a) Becke, A. D. *Phys. Rev. A* **1988**, *38*, 3098-3100. (b) Becke, A. D. *J. Chem. Phys.* **1993**, *98*, 5648-5652.
- (4) Lee, C.; Yang, W.; Parr, R. G. *Phys. Rev. B* **1988**, *37*, 785-789.
- (5) Perdew, J. P.; Wang, Y. *Phys. Rev.* **1992**, *B45*, 13244-13249.
- (6) Weigend, F.; Ahlrichs, R. *Phys. Chem. Chem. Phys.* **2005**, *7*, 3297-3305.
- (7) (a) Dunning, T. H., Jr.; Hay, P. J. In *Modern Theoretical Chemistry*, Schaefer, H. F., III, Ed.; Plenum: New York, 1976; p1-28. (b) Hay, P. J.; Wadt, W. R. *J. Chem. Phys.* 1985, *82*, 270-283. (c) Hay, P. J.; Wadt, W. R. *J. Chem. Phys.* 1985, *82*, 284-298. (d) Hay, P. J.; Wadt, W. R. *J. Chem. Phys.* 1985, *82*, 299-310. (e) Check, C. E.; Faust, T. O.; Bailey, J. M.; Wright, B. J.; Gilbert, T. M.; Sunderlin, L. S. *J. Phys. Chem. A* 2001, *105*, 8111-8116.
- (8) Grimme, S. *Wiley Interdiscip. Rev.: Comput. Mol. Sci.* **2011**, *1*, 211.

- (9) Grimme, S. *J. Comput. Chem.* **2006**, *27*, 1787.
- (10) Liptrot, D. J.; Power, P. P. *Nat. Rev. Chem.* **2017**, *1*, 4.

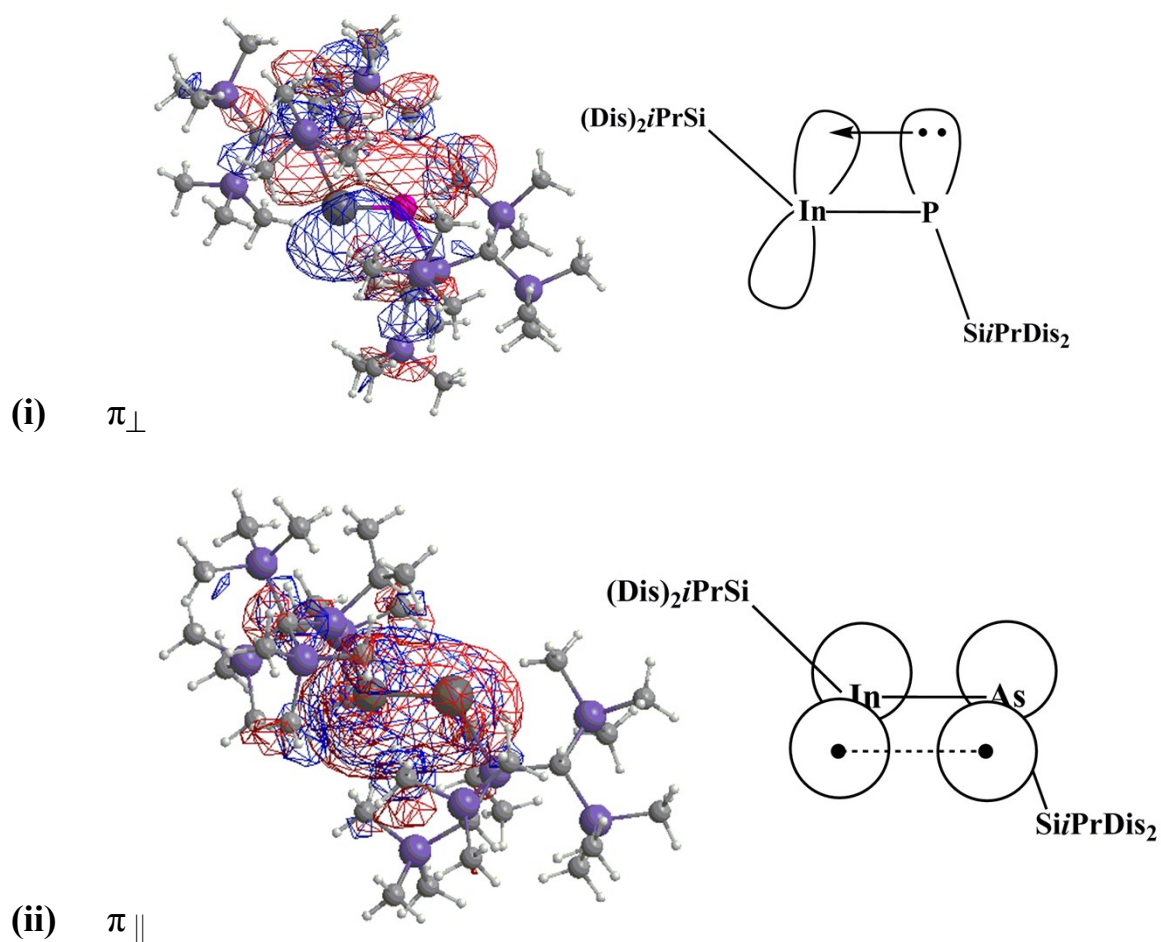

Figure S1: The natural  $\text{In}\equiv\text{P}$   $\pi$  bonding orbitals ((i) and (ii)) of  $(\text{SiPrDis}_2)\text{In}\equiv\text{P}(\text{SiPrDis}_2)$ . For comparison, also see Figure 2.

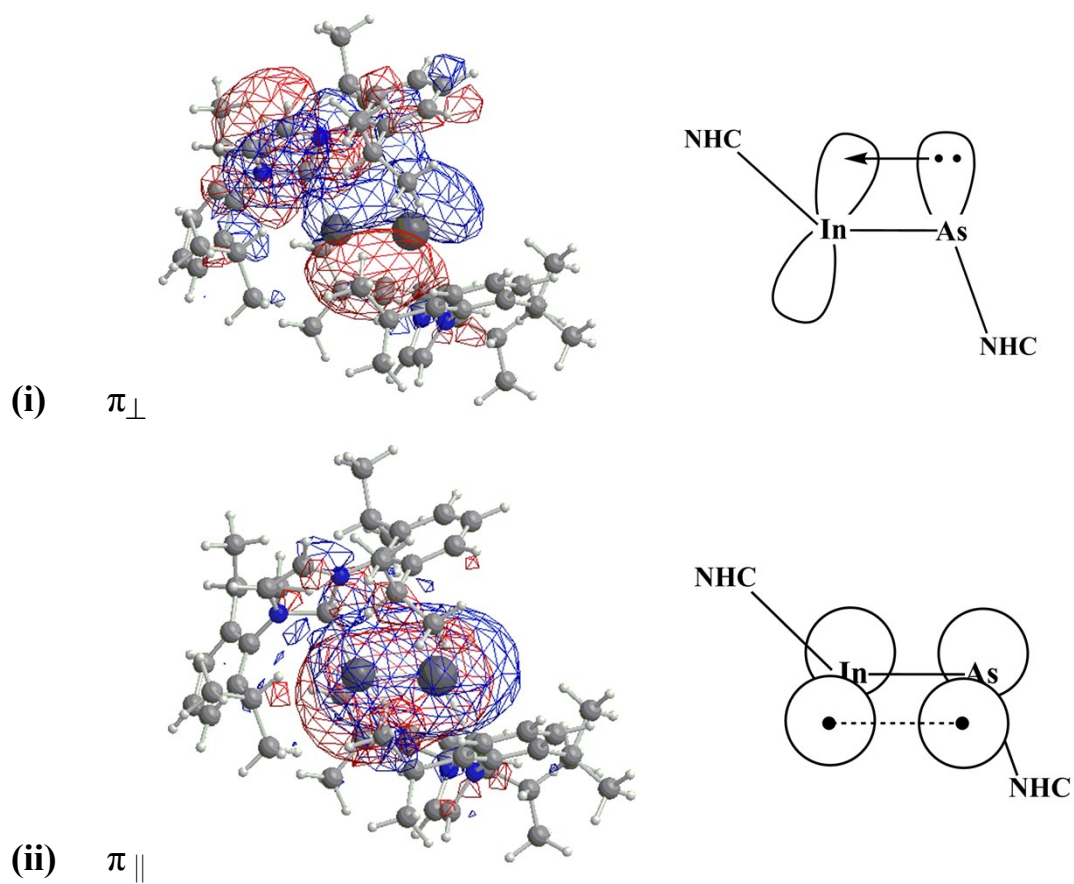

Figure S2: The natural  $\text{In}\equiv\text{P}$   $\pi$  bonding orbitals ((i) and (ii)) of  $((\text{NHC})\text{In}\equiv\text{P}(\text{NHC}))$ . For comparison, also see Figure 2.

M06-2X/Def2-TZVP

-----  
F2In-P

| Atomic<br>Number | Coordinates (Angstroms) |           |          |
|------------------|-------------------------|-----------|----------|
|                  | X                       | Y         | Z        |
| P                | -0.145842               | -2.241631 | 0.000000 |
| In               | 0.000000                | 0.201819  | 0.000000 |
| F                | -1.454650               | 1.489751  | 0.000000 |
| F                | 1.697720                | 1.147506  | 0.000000 |

-----  
Energy = -731.0860 hartree

ZPVE = -458763.7953 kcal/mol

Number of imaginary frequency (0)

-----  
F2In-P (TS1)

| Atomic<br>Number | Coordinates (Angstroms) |           |           |
|------------------|-------------------------|-----------|-----------|
|                  | X                       | Y         | Z         |
| P                | -2.082366               | 0.473293  | -0.004329 |
| In               | 0.292798                | 0.105611  | 0.003739  |
| F                | 2.182814                | 0.424440  | -0.010047 |
| F                | -0.306324               | -1.788255 | -0.003092 |

-----  
Energy = -731.081221 hartree

ZPVE = -458760.776989 kcal/mol

Number of imaginary frequency (1)

-----  
Imaginary frequency - -103.4371

-----  
-1 -0.05 0.57 0.00  
-2 -0.06 -0.18 -0.00  
-3 -0.15 0.44 0.00  
-4 0.59 -0.29 0.01  
-----

-----  
F-In-P-F

| Atomic<br>Number | Coordinates (Angstroms) |           |          |
|------------------|-------------------------|-----------|----------|
|                  | X                       | Y         | Z        |
| P                | 0.784822                | -1.738703 | 0.000000 |
| In               | 0.000000                | 0.543575  | 0.000000 |
| F                | -0.622667               | 2.378880  | 0.000000 |

S7

F -0.685370 -2.440503 0.000000

---

Energy = -731.134049 hartree  
ZPVE = -459497.728056 kcal/mol  
Number of imaginary frequency (0)

---

In-PF2 (TS2)

---

| Atomic<br>Number | Coordinates (Angstroms) |             |             |
|------------------|-------------------------|-------------|-------------|
|                  | X                       | Y           | Z           |
| P                | 1.78848874              | 0.60488054  | -0.10692636 |
| F                | 2.40403774              | -0.83149346 | 0.19566164  |
| F                | -1.18906174             | 1.66272746  | 0.13411636  |
| In               | -0.55641874             | -0.25892354 | -0.03445964 |

---

Energy = -731.090491 hartree  
ZPVE = -458766.594007 kcal/mol  
Number of imaginary frequency (1)

---

Imaginary frequency - -98.0654

---

-1 -0.27 0.02 0.06  
-2 0.23 0.31 0.01  
-3 0.87 0.03 -0.01  
-4 -0.11 -0.06 -0.02

---

In-PF2

---

| Atomic<br>Number | Coordinates (Angstroms) |           |           |
|------------------|-------------------------|-----------|-----------|
|                  | X                       | Y         | Z         |
| P                | 1.589204                | 0.000538  | 0.605444  |
| F                | 1.598532                | 1.212431  | -0.500574 |
| F                | 1.612487                | -1.207027 | -0.502360 |
| In               | -1.076270               | -0.001157 | -0.001128 |

---

Energy = -731.1731 hartree  
ZPVE = -428245.0379 kcal/mol  
Number of imaginary frequency (0)

---

(OH)2In-P

---

| Atomic | Coordinates (Angstroms) |  |  |
|--------|-------------------------|--|--|
|--------|-------------------------|--|--|



| Number | X         | Y         | Z        |
|--------|-----------|-----------|----------|
| P      | 0.015704  | -2.282083 | 0.000000 |
| In     | 0.000000  | 0.190369  | 0.000000 |
| O      | 1.540619  | 1.455178  | 0.000000 |
| H      | 2.427202  | 1.089791  | 0.000000 |
| O      | -1.682475 | 1.247012  | 0.000000 |
| H      | -1.527925 | 2.195864  | 0.000000 |

Energy = -682.987580 hartree  
 ZPVE = -459449.581587 kcal/mol  
 Number of imaginary frequency (0)

(OH)<sub>2</sub>In-P (TS1)

| Atomic Number | Coordinates (Angstroms) |           |           |
|---------------|-------------------------|-----------|-----------|
|               | X                       | Y         | Z         |
| P             | 1.965864                | -0.527288 | 0.010451  |
| In            | -0.338713               | -0.146742 | -0.003329 |
| O             | -2.223304               | 0.095724  | 0.030427  |
| H             | -2.812949               | -0.665641 | -0.051255 |
| O             | 0.827674                | 1.620118  | -0.113553 |
| H             | 1.086987                | 2.038567  | 0.722598  |

Energy = -682.982388 hartree  
 ZPVE = -428578.278293 kcal/mol  
 Number of imaginary frequency (1)

Imaginary frequency - -123.4234

|    |       |       |       |
|----|-------|-------|-------|
| -1 | -0.05 | 0.36  | -0.01 |
| -2 | -0.05 | -0.09 | 0.00  |
| -3 | -0.08 | 0.17  | -0.00 |
| -4 | -0.17 | 0.19  | -0.00 |
| -5 | 0.51  | -0.21 | 0.02  |
| -6 | 0.64  | -0.22 | 0.01  |

HO-In-P-OH

| Atomic Number | Coordinates (Angstroms) |           |          |
|---------------|-------------------------|-----------|----------|
|               | X                       | Y         | Z        |
| P             | -1.817757               | -0.590541 | 0.029727 |
| O             | -2.444617               | 0.957292  | 0.116981 |

|    |           |           |           |
|----|-----------|-----------|-----------|
| H  | -2.724979 | 1.266808  | -0.749311 |
| O  | 2.485306  | 0.329776  | -0.034291 |
| H  | 2.943291  | 0.413025  | 0.806347  |
| In | 0.545358  | -0.063638 | -0.023764 |

---

Energy = -683.043873 hartree  
ZPVE = -428616.860746 kcal/mol  
Number of imaginary frequency (0)

---

In-P(OH)2 (TS2)

---

| Atomic<br>Number | Coordinates (Angstroms) |             |             |
|------------------|-------------------------|-------------|-------------|
|                  | X                       | Y           | Z           |
| P                | -1.66449249             | 0.58168864  | -0.10195262 |
| In               | 0.66862849              | -0.31271664 | -0.02080038 |
| O                | -2.67149649             | -0.64329336 | 0.20742338  |
| H                | -2.49676749             | -1.44948136 | -0.29641062 |
| O                | 1.03945149              | 1.67781736  | 0.17216062  |
| H                | 0.87576349              | 2.40926136  | -0.43113138 |

---

Energy = -683.010949 hartree  
ZPVE = -428596.200606 kcal/mol  
Number of imaginary frequency (1)

---

Imaginary frequency - -146.9071

---

|    |       |       |       |
|----|-------|-------|-------|
| -1 | 0.02  | -0.12 | 0.08  |
| -2 | -0.08 | 0.06  | 0.02  |
| -3 | -0.03 | -0.17 | -0.13 |
| -4 | -0.22 | -0.05 | -0.44 |
| -5 | 0.58  | -0.04 | -0.11 |
| -6 | 0.56  | -0.06 | -0.13 |

---

In-P(OH)2

---

| Atomic<br>Number | Coordinates (Angstroms) |           |           |
|------------------|-------------------------|-----------|-----------|
|                  | X                       | Y         | Z         |
| In               | -1.002004               | -0.000115 | -0.010746 |
| P                | 1.605253                | 0.000205  | -0.599323 |
| O                | 1.304377                | -1.291969 | 0.474237  |
| H                | 2.080087                | -1.587589 | 0.964253  |
| O                | 1.303222                | 1.292211  | 0.474198  |
| H                | 2.078514                | 1.588222  | 0.964669  |

---

---

Energy = -683.090404 hartree  
ZPVE = -428646.059414 kcal/mol  
Number of imaginary frequency (0)

---

H2In-P

---

| Atomic<br>Number | Coordinates (Angstroms) |           |          |
|------------------|-------------------------|-----------|----------|
|                  | X                       | Y         | Z        |
| P                | 0.000035                | 1.912138  | 0.000000 |
| In               | 0.000035                | -0.530303 | 0.000000 |
| H                | 1.527530                | -1.351075 | 0.000000 |
| H                | -1.529797               | -1.346175 | 0.000000 |

---

Energy = -532.473565 hartree  
ZPVE = -334132.486773 kcal/mol  
Number of imaginary frequency (0)

---

H2In-P (TS1)

---

| Atomic<br>Number | Coordinates (Angstroms) |           |           |
|------------------|-------------------------|-----------|-----------|
|                  | X                       | Y         | Z         |
| P                | 1.817207                | -0.062718 | 0.000004  |
| In               | -0.515935               | 0.002029  | -0.000004 |
| H                | -1.946935               | -0.932099 | 0.000106  |
| H                | -0.030374               | 1.773431  | 0.000058  |

---

Energy = -532.475986 hartree  
ZPVE = -334134.005974 kcal/mol  
Number of imaginary frequency (1)

---

Imaginary frequency - -568.0845

---

-1 -0.04 0.03 0.00  
-2 0.00 -0.01 -0.00  
-3 -0.18 0.30 -0.00  
-4 0.92 -0.19 0.00

---

H-In-P-H

---

| Atomic<br>Number | Coordinates (Angstroms) |   |   |
|------------------|-------------------------|---|---|
|                  | X                       | Y | Z |

---

---

|    |           |           |           |
|----|-----------|-----------|-----------|
| H  | -1.702659 | 1.340499  | 0.000086  |
| P  | -1.777529 | -0.084648 | 0.000268  |
| In | 0.533006  | -0.002196 | -0.000197 |
| H  | 2.248299  | 0.036833  | 0.005534  |

---

Energy = -532.556766 hartree  
ZPVE = -334184.696232 kcal/mol  
Number of imaginary frequency (0)

---

In-PH2 (TS2)

---

| Atomic<br>Number | Coordinates (Angstroms) |           |           |
|------------------|-------------------------|-----------|-----------|
|                  | X                       | Y         | Z         |
| In               | 0.611937                | -0.028918 | 0.001416  |
| H                | 0.148437                | 1.728185  | -0.164948 |
| P                | -1.890897               | -0.032936 | -0.083293 |
| H                | -1.769897               | 0.182843  | 1.344960  |

---

Energy = -532.496903 hartree  
ZPVE = -334147.131601 kcal/mol  
Number of imaginary frequency (1)

---

Imaginary frequency - -918.7268

---

|    |       |       |       |
|----|-------|-------|-------|
| -1 | -0.01 | 0.00  | -0.00 |
| -2 | 0.99  | 0.16  | 0.02  |
| -3 | 0.00  | -0.02 | 0.00  |
| -4 | -0.00 | 0.01  | 0.00  |

---

In-PH2

---

| Atomic<br>Number | Coordinates (Angstroms) |           |           |
|------------------|-------------------------|-----------|-----------|
|                  | X                       | Y         | Z         |
| In               | -0.683553               | 0.000005  | -0.000276 |
| P                | 1.972669                | -0.000054 | -0.115068 |
| H                | 1.952332                | 1.024557  | 0.869480  |
| H                | 1.951722                | -1.023978 | 0.870063  |

---

Energy = -532.598490 hartree  
ZPVE = -334210.87845 kcal/mol  
Number of imaginary frequency (0)

---

---

---

(CH3)2In-P

---

| Atomic<br>Number | Coordinates (Angstroms) |           |           |
|------------------|-------------------------|-----------|-----------|
|                  | X                       | Y         | Z         |
| C                | 1.298599                | -1.883898 | -0.003957 |
| H                | 1.550950                | -2.148818 | 1.022865  |
| H                | 0.725622                | -2.695203 | -0.447053 |
| H                | 2.223669                | -1.750827 | -0.563426 |
| C                | 1.259787                | 1.906431  | 0.000220  |
| H                | 0.725573                | 2.662693  | 0.571762  |
| H                | 1.365492                | 2.256613  | -1.026767 |
| H                | 2.252338                | 1.768430  | 0.426227  |
| P                | -2.251099               | -0.013574 | -0.001080 |
| In               | 0.195358                | -0.000500 | 0.001123  |

---

Energy = -611.047229 hartree  
ZPVE = -383438.246669 kcal/mol  
Number of imaginary frequency (0)

---

---

(CH3)2In-P (TS1)

---

| Atomic<br>Number | Coordinates (Angstroms) |           |           |
|------------------|-------------------------|-----------|-----------|
|                  | X                       | Y         | Z         |
| In               | -0.233254               | -0.035127 | -0.000825 |
| P                | 2.074392                | -0.712472 | 0.000880  |
| C                | 0.153100                | 2.150818  | 0.000765  |
| H                | 1.210217                | 2.416681  | -0.016650 |
| H                | -0.335407               | 2.573358  | -0.877731 |
| H                | -0.305580               | 2.564438  | 0.900254  |
| C                | -2.234655               | -0.852459 | 0.001358  |
| H                | -2.231280               | -1.942841 | -0.018807 |
| H                | -2.758749               | -0.512358 | 0.896445  |
| H                | -2.776321               | -0.481153 | -0.869010 |

---

Energy = -611.046050 hartree  
ZPVE = -383437.506831 kcal/mol  
Number of imaginary frequency (1)

---

Imaginary frequency - -93.6555

---

-1 49 -0.04 -0.08 0.00  
-2 15 0.00 0.28 -0.00  
-3 6 0.38 -0.11 -0.00

-4 1 0.41 -0.24 0.01  
-5 1 0.44 -0.08 -0.02  
-6 1 0.41 -0.08 0.00  
-7 6 -0.11 0.14 -0.00  
-8 1 -0.19 0.14 -0.01  
-9 1 -0.08 0.17 0.00  
-10 1 -0.08 0.19 0.00

---

---

H3C-In-P-CH3

---

| Atomic<br>Number | Coordinates (Angstroms) |           |           |
|------------------|-------------------------|-----------|-----------|
|                  | X                       | Y         | Z         |
| In               | -0.516019               | -0.042590 | -0.001425 |
| P                | 1.719256                | -0.701659 | 0.002148  |
| C                | -2.639456               | 0.319668  | 0.005666  |
| H                | -3.153095               | -0.507566 | -0.483903 |
| H                | -2.857712               | 1.236287  | -0.541418 |
| H                | -3.009194               | 0.415691  | 1.024851  |
| C                | 2.629119                | 0.957513  | -0.000143 |
| H                | 3.682122                | 0.691796  | 0.102153  |
| H                | 2.519634                | 1.506530  | -0.932721 |
| H                | 2.376370                | 1.605970  | 0.835511  |

---

Energy = -611.114169 hartree  
ZPVE = -383480.252189 kcal/mol  
Number of imaginary frequency (0)

---

---

In-P(CH3)2 (TS2)

---

| Atomic<br>Number | Coordinates (Angstroms) |           |           |
|------------------|-------------------------|-----------|-----------|
|                  | X                       | Y         | Z         |
| P                | 1.564609                | 0.007767  | -0.808057 |
| In               | -0.813714               | -0.363722 | 0.044492  |
| C                | -0.610531               | 1.992023  | 0.105465  |
| H                | -1.381767               | 2.209762  | 0.851698  |
| H                | -0.922595               | 2.336527  | -0.886908 |
| H                | 0.333806                | 2.459787  | 0.393483  |
| C                | 2.379255                | -0.123880 | 0.882618  |
| H                | 2.934142                | -1.075598 | 0.908692  |
| H                | 1.699692                | -0.107267 | 1.750793  |
| H                | 3.127231                | 0.673822  | 0.994509  |

---

Energy = -611.056701 hartree

ZPVE = -383444.190444 kcal/mol  
Number of imaginary frequency (1)

---

Imaginary frequency - -386.8666

---

|     |       |       |       |
|-----|-------|-------|-------|
| -1  | -0.03 | 0.16  | 0.04  |
| -2  | -0.04 | -0.05 | 0.01  |
| -3  | 0.41  | 0.03  | -0.16 |
| -4  | 0.45  | -0.42 | 0.02  |
| -5  | 0.10  | -0.01 | -0.07 |
| -6  | 0.26  | 0.37  | -0.24 |
| -7  | 0.01  | 0.03  | -0.01 |
| -8  | -0.04 | -0.01 | -0.21 |
| -9  | -0.01 | -0.18 | -0.02 |
| -10 | 0.02  | -0.02 | 0.17  |

---

---

In-P(CH3)2

---

| Atomic<br>Number | Coordinates (Angstroms) |           |           |
|------------------|-------------------------|-----------|-----------|
|                  | X                       | Y         | Z         |
| In               | 1.081429                | -0.000183 | 0.021676  |
| P                | -1.445455               | 0.000153  | -0.748706 |
| C                | -1.713894               | -1.392138 | 0.480628  |
| H                | -1.046482               | -1.380395 | 1.354937  |
| H                | -2.732977               | -1.332900 | 0.866887  |
| H                | -1.599816               | -2.353413 | -0.020794 |
| C                | -1.712135               | 1.392823  | 0.480518  |
| H                | -2.731991               | 1.336326  | 0.865110  |
| H                | -1.046166               | 1.379030  | 1.355899  |
| H                | -1.594578               | 2.353912  | -0.020460 |

---

Energy = -611.152355 hartree  
ZPVE = -383504.214286 kcal/mol  
Number of imaginary frequency (0)

---

---

(SiH3)2In-P

---

| Atomic<br>Number | Coordinates (Angstroms) |           |           |
|------------------|-------------------------|-----------|-----------|
|                  | X                       | Y         | Z         |
| In               | 0.000155                | 0.089183  | 0.004966  |
| P                | -0.005657               | 2.494255  | -0.005054 |
| Si               | -2.267959               | -1.185945 | -0.003043 |
| H                | -3.389192               | -0.331909 | 0.442751  |

---

|    |           |           |           |
|----|-----------|-----------|-----------|
| H  | -2.552776 | -1.660637 | -1.375728 |
| H  | -2.183783 | -2.361154 | 0.891751  |
| Si | 2.272505  | -1.177940 | -0.003278 |
| H  | 3.402395  | -0.314160 | 0.400847  |
| H  | 2.534940  | -1.694468 | -1.365898 |
| H  | 2.202049  | -2.327090 | 0.927262  |

-----  
Energy = -1113.820298 hartree  
ZPVE = -698933.375197 kcal/mol  
Number of imaginary frequency (0)  
-----

(SiH3)2In-P (TS1)

| Atomic<br>Number | Coordinates (Angstroms) |           |           |
|------------------|-------------------------|-----------|-----------|
|                  | X                       | Y         | Z         |
| P                | 0.006590                | 2.513734  | -0.017850 |
| In               | -0.000113               | 0.103683  | 0.015728  |
| Si               | 2.262594                | -1.213919 | -0.013615 |
| H                | 2.353670                | -2.062137 | 1.204448  |
| H                | 2.291422                | -2.100538 | -1.204893 |
| H                | 3.441930                | -0.314549 | -0.060515 |
| Si               | -2.267882               | -1.204945 | -0.013634 |
| H                | -2.365004               | -2.047691 | 1.207745  |
| H                | -3.443385               | -0.300920 | -0.066930 |
| H                | -2.297898               | -2.096539 | -1.201271 |

-----  
Energy = -1113.819750 hartree  
ZPVE = -698933.03132 kcal/mol  
Number of imaginary frequency (1)  
-----

Imaginary frequency - -76.7579

|     |    |       |       |       |
|-----|----|-------|-------|-------|
| -1  | 15 | 0.53  | -0.00 | -0.00 |
| -2  | 49 | -0.16 | 0.00  | -0.00 |
| -3  | 14 | 0.03  | 0.25  | -0.00 |
| -4  | 1  | 0.12  | 0.27  | 0.01  |
| -5  | 1  | 0.09  | 0.23  | 0.01  |
| -6  | 1  | -0.05 | 0.35  | -0.03 |
| -7  | 14 | 0.03  | -0.25 | 0.00  |
| -8  | 1  | 0.12  | -0.28 | -0.01 |
| -9  | 1  | -0.05 | -0.35 | 0.04  |
| -10 | 1  | 0.09  | -0.23 | -0.01 |

-----  
H3Si-In-P-SiH3



---

| Atomic<br>Number | Coordinates (Angstroms) |           |           |
|------------------|-------------------------|-----------|-----------|
|                  | X                       | Y         | Z         |
| P                | 1.698679                | -1.071221 | -0.003162 |
| In               | -0.436940               | -0.183776 | 0.001664  |
| Si               | 2.730231                | 0.924828  | -0.000720 |
| H                | 3.265886                | 1.273518  | -1.342031 |
| H                | 1.920785                | 2.099758  | 0.441039  |
| H                | 3.892305                | 0.837629  | 0.923012  |
| Si               | -2.936197               | 0.447743  | -0.000531 |
| H                | -3.671843               | -0.685400 | -0.610309 |
| H                | -3.430127               | 0.663188  | 1.378072  |
| H                | -3.163623               | 1.668620  | -0.806369 |

---

Energy = -1113.905122 hartree  
 ZPVE = -698986.603106 kcal/mol  
 Number of imaginary frequency (0)

---

In-P(SiH3)2 (TS2)

---

| Atomic<br>Number | Coordinates (Angstroms) |           |           |
|------------------|-------------------------|-----------|-----------|
|                  | X                       | Y         | Z         |
| P                | -1.166596               | -0.168177 | -1.074344 |
| In               | 0.835948                | -0.754163 | 0.143768  |
| Si               | 1.334911                | 1.873234  | -0.012321 |
| H                | 2.318261                | 2.024424  | -1.101312 |
| H                | 0.224678                | 2.823950  | -0.184068 |
| H                | 1.983254                | 2.157253  | 1.286055  |
| Si               | -2.682431               | 0.339247  | 0.483269  |
| H                | -2.505285               | -0.352548 | 1.779816  |
| H                | -2.564619               | 1.803555  | 0.683256  |
| H                | -4.053547               | 0.045253  | 0.013502  |

---

Energy = -1113.858832 hartree  
 ZPVE = -698957.555668 kcal/mol  
 Number of imaginary frequency (1)

---

Imaginary frequency - -137.1348

---

|    |       |       |       |
|----|-------|-------|-------|
| -1 | -0.05 | -0.11 | -0.09 |
| -2 | -0.07 | 0.07  | 0.01  |
| -3 | 0.32  | -0.04 | 0.02  |
| -4 | -0.08 | 0.08  | -0.15 |
| -5 | 0.29  | -0.19 | 0.40  |

-6 0.61 -0.00 -0.27  
-7 -0.01 -0.13 0.03  
-8 0.02 -0.04 0.12  
-9 0.02 -0.10 -0.07  
-10 -0.07 -0.19 0.07

---

---

In-P(SiH3)2

---

---

| Atomic<br>Number | Coordinates (Angstroms) |           |           |
|------------------|-------------------------|-----------|-----------|
|                  | X                       | Y         | Z         |
| Si               | -1.640496               | 1.623592  | -0.315505 |
| H                | -0.960460               | 1.576478  | -1.647010 |
| H                | -3.099538               | 1.549649  | -0.572330 |
| H                | -1.321274               | 2.944690  | 0.279729  |
| Si               | -1.644311               | -1.621822 | -0.315483 |
| H                | -1.295894               | -2.942740 | 0.265266  |
| H                | -3.109030               | -1.567306 | -0.543575 |
| H                | -0.990985               | -1.556287 | -1.660043 |
| In               | 1.456220                | -0.000797 | -0.068240 |
| P                | -0.972688               | 0.000653  | 1.070370  |

---

---

Energy = -1113.950963 hartree  
ZPVE = -699015.368792 kcal/mol  
Number of imaginary frequency (0)

---

---

B3PW91/Def2-TZVP

---

---

F2In-P

---

---

| Atomic<br>Number | Coordinates (Angstroms) |           |          |
|------------------|-------------------------|-----------|----------|
|                  | X                       | Y         | Z        |
| P                | -0.147513               | -2.224791 | 0.000000 |
| In               | 0.000000                | 0.198385  | 0.000000 |
| F                | -1.456606               | 1.485075  | 0.000000 |
| F                | 1.702461                | 1.142816  | 0.000000 |

---

---

Energy = -731.228035 hartree  
ZPVE = -458852.904242 kcal/mol  
Number of imaginary frequency (0)

---

---

F2In-P (TS1)

---

| Atomic<br>Number | Coordinates (Angstroms) |           |           |
|------------------|-------------------------|-----------|-----------|
|                  | X                       | Y         | Z         |
| P                | -2.082366               | -0.473293 | 0.004329  |
| In               | 0.292798                | -0.105611 | -0.003739 |
| F                | 2.182814                | -0.424440 | 0.010047  |
| F                | -0.306324               | 1.788255  | 0.003092  |

---

Energy = -731.225700 hartree  
 ZPVE = -458851.439007 kcal/mol  
 Number of imaginary frequency (1)

---

Imaginary frequency - -124.1566

---

|    |       |       |       |
|----|-------|-------|-------|
| -1 | 0.09  | 0.55  | 0.00  |
| -2 | 0.07  | -0.15 | -0.00 |
| -3 | 0.13  | 0.29  | 0.00  |
| -4 | -0.69 | -0.29 | 0.01  |

---

#### F-In-P-F

---

| Atomic<br>Number | Coordinates (Angstroms) |           |          |
|------------------|-------------------------|-----------|----------|
|                  | X                       | Y         | Z        |
| P                | 0.747432                | -1.738221 | 0.000000 |
| In               | 0.000000                | 0.544868  | 0.000000 |
| F                | -0.539731               | 2.406959  | 0.000000 |
| F                | -0.705990               | -2.476427 | 0.000000 |

---

Energy = -731.285512 hartree  
 ZPVE = -458888.971635 kcal/mol  
 Number of imaginary frequency (0)

---

#### In-PF2 (TS2)

---

| Atomic<br>Number | Coordinates (Angstroms) |           |           |
|------------------|-------------------------|-----------|-----------|
|                  | X                       | Y         | Z         |
| In               | 0.611937                | -0.028918 | 0.001416  |
| H                | 0.148437                | 1.728185  | -0.164948 |
| P                | -1.890897               | -0.032936 | -0.083293 |
| H                | -1.769897               | 0.182843  | 1.344960  |

---

Energy = -731.249037 hartree

ZPVE = -458866.083207 kcal/mol  
Number of imaginary frequency (1)

-----  
Imaginary frequency - -150.4181  
-----

-1 0.04 0.24 -0.26  
-2 -0.15 0.21 0.34  
-3 0.78 0.05 0.25  
-4 -0.12 -0.11 -0.03  
-----

-----  
In-PF2  
-----

| Atomic<br>Number | Coordinates (Angstroms) |           |           |
|------------------|-------------------------|-----------|-----------|
|                  | X                       | Y         | Z         |
| P                | 1.567513                | -0.000195 | 0.600680  |
| F                | 1.716486                | 1.227665  | -0.473832 |
| F                | 1.717803                | -1.226785 | -0.474326 |
| In               | -1.110639               | -0.000102 | -0.009730 |

-----

Energy = -731.323942 hartree  
ZPVE = -458913.086844 kcal/mol  
Number of imaginary frequency (0)  
-----

(OH)2In-P  
-----

| Atomic<br>Number | Coordinates (Angstroms) |           |          |
|------------------|-------------------------|-----------|----------|
|                  | X                       | Y         | Z        |
| P                | -0.041010               | -2.249870 | 0.000000 |
| In               | 0.000000                | 0.178434  | 0.000000 |
| O                | 1.573275                | 1.407294  | 0.000000 |
| H                | 2.423769                | 0.959549  | 0.000000 |
| O                | -1.627999               | 1.317637  | 0.000000 |
| H                | -1.370823               | 2.245791  | 0.000000 |

-----

Energy = -683.138186 hartree  
ZPVE = -428676.043096 kcal/mol  
Number of imaginary frequency (0)  
-----

(OH)2In-P (TS1)  
-----

| Atomic<br>Number | Coordinates (Angstroms) |   |   |
|------------------|-------------------------|---|---|
|                  | X                       | Y | Z |

---

|    |           |           |           |
|----|-----------|-----------|-----------|
| P  | 2.136741  | -0.468211 | 0.005895  |
| In | -0.248833 | -0.077918 | -0.000865 |
| O  | -2.128259 | -0.681852 | 0.020049  |
| H  | -2.230816 | -1.634486 | -0.059788 |
| O  | -0.066628 | 1.941971  | -0.110684 |
| H  | -0.068378 | 2.394687  | 0.738846  |

---

Energy = -683.134537 hartree  
 ZPVE = -428673.753312 kcal/mol  
 Number of imaginary frequency (1)

---

Imaginary frequency - -140.1353

---

|    |       |       |       |
|----|-------|-------|-------|
| -1 | -0.05 | 0.33  | -0.00 |
| -2 | -0.05 | -0.08 | -0.00 |
| -3 | -0.07 | 0.13  | 0.01  |
| -4 | -0.14 | 0.15  | -0.05 |
| -5 | 0.48  | -0.19 | 0.01  |
| -6 | 0.70  | -0.23 | 0.03  |

---

HO-In-P-OH

---

| Atomic<br>Number | Coordinates (Angstroms) |           |           |
|------------------|-------------------------|-----------|-----------|
|                  | X                       | Y         | Z         |
| P                | -1.804078               | -0.590186 | 0.001732  |
| O                | -2.493514               | 0.929080  | 0.118912  |
| H                | -2.722155               | 1.265261  | -0.753566 |
| O                | 2.492425                | 0.323442  | -0.086665 |
| H                | 2.918584                | 0.376101  | 0.775524  |
| In               | 0.548438                | -0.057321 | -0.006243 |

---

Energy = -683.203945 hartree  
 ZPVE = -428717.307526 kcal/mol  
 Number of imaginary frequency (0)

---

In-P(OH)<sub>2</sub> (TS2)

---

| Atomic<br>Number | Coordinates (Angstroms) |             |             |
|------------------|-------------------------|-------------|-------------|
|                  | X                       | Y           | Z           |
| P                | 1.43656980              | 0.50051894  | 0.15594148  |
| In               | -0.86985800             | -0.37304700 | 0.02113300  |
| O                | 2.47646080              | -0.72697906 | -0.29732852 |

---

|   |             |             |             |
|---|-------------|-------------|-------------|
| H | 2.29628980  | -1.57833706 | 0.14848548  |
| O | -1.11637300 | 1.56949000  | -0.24538600 |
| H | -0.81593200 | 2.30952400  | 0.30928600  |

-----  
Energy = -683.169969 hartree  
ZPVE = -428695.987247 kcal/mol  
Number of imaginary frequency (1)  
-----

Imaginary frequency - -124.3837  
-----

|    |       |       |       |
|----|-------|-------|-------|
| -1 | 0.00  | 0.10  | 0.15  |
| -2 | -0.06 | -0.05 | 0.02  |
| -3 | -0.09 | 0.15  | -0.21 |
| -4 | -0.24 | 0.02  | -0.53 |
| -5 | 0.49  | 0.03  | -0.18 |
| -6 | 0.46  | 0.09  | -0.24 |

-----  
In-P(OH)2  
-----

| Atomic<br>Number | Coordinates (Angstroms) |           |           |
|------------------|-------------------------|-----------|-----------|
|                  | X                       | Y         | Z         |
| In               | 1.024989                | -0.007684 | -0.001123 |
| P                | -1.561146               | 0.010494  | -0.604893 |
| O                | -1.356151               | 1.319089  | 0.466916  |
| H                | -2.188226               | 1.656101  | 0.816264  |
| O                | -1.434967               | -1.299653 | 0.471387  |
| H                | -2.290109               | -1.592495 | 0.805740  |

-----  
Energy = -683.246252 hartree  
ZPVE = -428743.855592 kcal/mol  
Number of imaginary frequency (0)  
-----

-----  
H2In-P  
-----

| Atomic<br>Number | Coordinates (Angstroms) |           |          |
|------------------|-------------------------|-----------|----------|
|                  | X                       | Y         | Z        |
| P                | 0.000038                | 1.870171  | 0.000000 |
| In               | 0.000038                | -0.516470 | 0.000000 |
| H                | -1.492874               | -1.370344 | 0.000000 |
| H                | 1.490471                | -1.375172 | 0.000000 |

-----  
Energy = -532.645668 hartree  
ZPVE = -334240.483126 kcal/mol  
-----

Number of imaginary frequency (0)

H2In-P (TS1)

| Atomic<br>Number | Coordinates (Angstroms) |           |           |
|------------------|-------------------------|-----------|-----------|
|                  | X                       | Y         | Z         |
| P                | 1.855922                | -0.027872 | -0.000048 |
| In               | -0.515249               | -0.004889 | 0.000013  |
| H                | -1.830827               | -1.077402 | 0.000046  |
| H                | -0.760805               | 1.735067  | 0.000021  |

Energy = -532.645671 hartree

ZPVE = -334240.485009 kcal/mol

Number of imaginary frequency (1)

Imaginary frequency - -211.8792

|    |       |       |       |
|----|-------|-------|-------|
| -1 | -0.04 | 0.03  | 0.00  |
| -2 | 0.01  | -0.01 | -0.00 |
| -3 | -0.36 | 0.47  | 0.00  |
| -4 | 0.79  | 0.14  | -0.00 |

H-In-P-H

| Atomic<br>Number | Coordinates (Angstroms) |           |           |
|------------------|-------------------------|-----------|-----------|
|                  | X                       | Y         | Z         |
| H                | -1.678233               | 1.348212  | 0.000001  |
| P                | -1.770560               | -0.083828 | 0.000008  |
| In               | 0.530666                | -0.002865 | -0.000005 |
| H                | 2.234008                | 0.049587  | 0.000153  |

Energy = -532.730064 hartree

ZPVE = -334293.442460 kcal/mol

Number of imaginary frequency (0)

In-PH2 (TS2)

| Atomic<br>Number | Coordinates (Angstroms) |           |           |
|------------------|-------------------------|-----------|-----------|
|                  | X                       | Y         | Z         |
| In               | 0.611937                | -0.028918 | 0.001416  |
| H                | 0.148437                | 1.728185  | -0.164948 |

|   |           |           |           |
|---|-----------|-----------|-----------|
| P | -1.890897 | -0.032936 | -0.083293 |
| H | -1.769897 | 0.182843  | 1.344960  |

---

Energy = -532.677593 hartree  
ZPVE = -334260.516383 kcal/mol  
Number of imaginary frequency (1)

---

Imaginary frequency - -801.3588

---

|    |       |       |       |
|----|-------|-------|-------|
| -1 | -0.01 | 0.00  | -0.00 |
| -2 | 0.99  | 0.16  | 0.02  |
| -3 | 0.00  | -0.02 | 0.00  |
| -4 | -0.01 | -0.00 | 0.00  |

---

In-PH2

---

| Atomic<br>Number | Coordinates (Angstroms) |           |           |
|------------------|-------------------------|-----------|-----------|
|                  | X                       | Y         | Z         |
| In               | -0.680049               | 0.000001  | -0.000104 |
| P                | 1.961047                | -0.000004 | -0.115877 |
| H                | 1.953410                | 1.030451  | 0.871605  |
| H                | 1.953309                | -1.030435 | 0.871625  |

---

Energy = -532.771817 hartree  
ZPVE = -334319.642885 kcal/mol  
Number of imaginary frequency (0)

---

(CH3)2In-P

---

| Atomic<br>Number | Coordinates (Angstroms) |           |           |
|------------------|-------------------------|-----------|-----------|
|                  | X                       | Y         | Z         |
| C                | 1.338314                | -1.836534 | -0.002360 |
| H                | 1.629123                | -2.062038 | 1.024607  |
| H                | 0.761963                | -2.667260 | -0.405116 |
| H                | 2.233543                | -1.677581 | -0.603564 |
| C                | 1.325012                | 1.845096  | 0.001521  |
| H                | 0.722001                | 2.691128  | 0.324612  |
| H                | 1.686649                | 2.021010  | -1.012523 |
| H                | 2.176732                | 1.716574  | 0.669705  |
| P                | -2.222016               | -0.003937 | -0.000247 |
| In               | 0.166128                | -0.000289 | 0.000225  |

---

Energy = -611.231291 hartree



ZPVE = -383553.747415 kcal/mol  
Number of imaginary frequency (0)

(CH3)2In-P (TS1)

| Atomic<br>Number | Coordinates (Angstroms) |           |           |
|------------------|-------------------------|-----------|-----------|
|                  | X                       | Y         | Z         |
| In               | -0.190011               | -0.053629 | -0.000592 |
| P                | 2.134941                | -0.495037 | 0.000632  |
| C                | -0.325056               | 2.157321  | 0.000658  |
| H                | 0.647339                | 2.642273  | -0.017586 |
| H                | -0.900510               | 2.433250  | -0.883222 |
| H                | -0.867668               | 2.434629  | 0.904693  |
| C                | -2.073983               | -1.100212 | 0.000974  |
| H                | -1.921953               | -2.177851 | -0.022404 |
| H                | -2.626943               | -0.828765 | 0.901012  |
| H                | -2.649616               | -0.792837 | -0.872769 |

Energy = -611.230977 hartree  
ZPVE = -383553.550377 kcal/mol  
Number of imaginary frequency (1)

Imaginary frequency - -61.1564

|     |       |       |       |
|-----|-------|-------|-------|
| -1  | -0.03 | -0.09 | 0.00  |
| -2  | 0.00  | 0.28  | -0.00 |
| -3  | 0.37  | -0.02 | 0.00  |
| -4  | 0.43  | -0.15 | 0.02  |
| -5  | 0.43  | 0.03  | -0.02 |
| -6  | 0.39  | 0.02  | -0.00 |
| -7  | -0.14 | 0.15  | 0.00  |
| -8  | -0.26 | 0.14  | -0.00 |
| -9  | -0.12 | 0.20  | -0.00 |
| -10 | -0.11 | 0.21  | 0.00  |

H3C-In-P-CH3

| Atomic<br>Number | Coordinates (Angstroms) |           |           |
|------------------|-------------------------|-----------|-----------|
|                  | X                       | Y         | Z         |
| In               | -0.519678               | -0.026282 | -0.000779 |
| P                | 1.702648                | -0.703666 | 0.001239  |
| C                | -2.641725               | 0.282948  | 0.004235  |
| H                | -3.125774               | -0.549926 | -0.508356 |

|   |           |          |           |
|---|-----------|----------|-----------|
| H | -2.874023 | 1.206875 | -0.526746 |
| H | -3.014320 | 0.347228 | 1.026326  |
| C | 2.673861  | 0.915081 | -0.000276 |
| H | 3.719926  | 0.608814 | 0.090530  |
| H | 2.574879  | 1.474780 | -0.930471 |
| H | 2.450970  | 1.566881 | 0.844550  |

-----  
 Energy = -611.302201 hartree  
 ZPVE = -383598.244149 kcal/mol  
 Number of imaginary frequency (0)  
 -----

In-P(CH3)2 (TS2)  
 -----

| Atomic<br>Number | Coordinates (Angstroms) |           |           |
|------------------|-------------------------|-----------|-----------|
|                  | X                       | Y         | Z         |
| P                | 1.557863                | 0.003207  | -0.795149 |
| In               | -0.793970               | -0.370210 | 0.045953  |
| C                | -0.666600               | 1.988449  | 0.081872  |
| H                | -1.479472               | 2.181334  | 0.778368  |
| H                | -0.915200               | 2.316085  | -0.925740 |
| H                | 0.260312                | 2.436670  | 0.425796  |
| C                | 2.339040                | -0.073771 | 0.877647  |
| H                | 2.881571                | -1.024103 | 0.939176  |
| H                | 1.661309                | -0.018766 | 1.737686  |
| H                | 3.093434                | 0.712905  | 0.963158  |

-----  
 Energy = -611.250597 hartree  
 ZPVE = -383565.862123 kcal/mol  
 Number of imaginary frequency (1)  
 -----

Imaginary frequency - -298.1055  
 -----

|     |       |       |       |
|-----|-------|-------|-------|
| -1  | -0.04 | 0.17  | 0.03  |
| -2  | -0.04 | -0.05 | 0.01  |
| -3  | 0.40  | 0.06  | -0.16 |
| -4  | 0.50  | -0.29 | 0.05  |
| -5  | 0.07  | 0.02  | -0.08 |
| -6  | 0.33  | 0.32  | -0.31 |
| -7  | -0.00 | 0.02  | -0.00 |
| -8  | -0.03 | -0.01 | -0.21 |
| -9  | -0.02 | -0.20 | -0.00 |
| -10 | -0.00 | -0.01 | 0.18  |

-----  
 In-P(CH3)2

---

| Atomic<br>Number | Coordinates (Angstroms) |           |           |
|------------------|-------------------------|-----------|-----------|
|                  | X                       | Y         | Z         |
| In               | 1.133011                | -0.000023 | 0.033516  |
| P                | -1.401068               | -0.000005 | -0.699653 |
| C                | -1.876508               | -1.423708 | 0.419493  |
| H                | -1.412290               | -1.412656 | 1.413422  |
| H                | -2.961652               | -1.418431 | 0.566663  |
| H                | -1.618934               | -2.366273 | -0.070554 |
| C                | -1.876257               | 1.423835  | 0.419444  |
| H                | -2.961222               | 1.418010  | 0.567642  |
| H                | -1.411112               | 1.413437  | 1.412900  |
| H                | -1.619713               | 2.366347  | -0.071156 |

---

Energy = -611.337606 hartree  
 ZPVE = -383620.461141 kcal/mol  
 Number of imaginary frequency (0)

---

(SiH3)2In-P

---

| Atomic<br>Number | Coordinates (Angstroms) |           |           |
|------------------|-------------------------|-----------|-----------|
|                  | X                       | Y         | Z         |
| P                | 1.294252                | 2.103662  | 0.005558  |
| In               | -0.009389               | 0.162216  | -0.004733 |
| Si               | 1.477516                | -1.981622 | 0.003262  |
| H                | 1.126737                | -2.779758 | 1.213050  |
| H                | 1.153385                | -2.775720 | -1.216391 |
| H                | 2.935860                | -1.687252 | 0.019535  |
| Si               | -2.549994               | -0.249112 | 0.003742  |
| H                | -3.307027               | 1.023618  | -0.147861 |
| H                | -2.915057               | -1.165364 | -1.112194 |
| H                | -2.932923               | -0.888783 | 1.294347  |

---

Energy = -1113.993663 hartree  
 ZPVE = -699042.163469 kcal/mol  
 Number of imaginary frequency (0)

---

(SiH3)2In-P (TS1)

---

| Atomic<br>Number | Coordinates (Angstroms) |          |          |
|------------------|-------------------------|----------|----------|
|                  | X                       | Y        | Z        |
| P                | 0.197378                | 2.482117 | 0.001101 |

---

|    |           |           |           |
|----|-----------|-----------|-----------|
| In | 0.004637  | 0.149655  | -0.000796 |
| Si | 2.077508  | -1.406880 | 0.000660  |
| H  | 2.018783  | -2.285760 | 1.200613  |
| H  | 2.037722  | -2.256001 | -1.219608 |
| H  | 3.354789  | -0.647830 | 0.020935  |
| Si | -2.257762 | -1.110697 | 0.000657  |
| H  | -2.322809 | -1.987296 | 1.202246  |
| H  | -3.418358 | -0.182215 | 0.017891  |
| H  | -2.334458 | -1.959678 | -1.218039 |

-----  
Energy = -1113.993402 hartree  
ZPVE = -699041.999689 kcal/mol  
Number of imaginary frequency (1)  
-----

Imaginary frequency - -246.5637  
-----

|     |       |       |       |
|-----|-------|-------|-------|
| -1  | -0.01 | 0.09  | -0.02 |
| -2  | 0.02  | -0.01 | 0.00  |
| -3  | 0.01  | 0.01  | 0.01  |
| -4  | 0.01  | -0.01 | -0.01 |
| -5  | -0.01 | -0.01 | 0.01  |
| -6  | 0.04  | 0.02  | -0.01 |
| -7  | -0.09 | -0.07 | -0.00 |
| -8  | 0.59  | -0.08 | -0.38 |
| -9  | 0.03  | 0.44  | 0.47  |
| -10 | -0.20 | -0.14 | -0.01 |

-----  
H3Si-In-P-SiH3  
-----

| Atomic<br>Number | Coordinates (Angstroms) |           |           |
|------------------|-------------------------|-----------|-----------|
|                  | X                       | Y         | Z         |
| P                | 1.673745                | -1.063431 | 0.004629  |
| In               | -0.453576               | -0.160046 | -0.003711 |
| Si               | 2.819623                | 0.874479  | 0.000662  |
| H                | 3.327642                | 1.222076  | -1.356765 |
| H                | 2.107375                | 2.087581  | 0.508184  |
| H                | 4.015749                | 0.682050  | 0.872297  |
| Si               | -2.960829               | 0.427512  | 0.006326  |
| H                | -3.689921               | -0.707330 | -0.619115 |
| H                | -3.458173               | 0.619918  | 1.392431  |
| H                | -3.206747               | 1.661559  | -0.782454 |

-----  
Energy = -1114.073960 hartree  
ZPVE = -699092.550631 kcal/mol  
Number of imaginary frequency (0)  
-----

-----  
-----  
In-P(SiH3)2 (TS2)  
-----

| Atomic<br>Number | Coordinates (Angstroms) |           |           |
|------------------|-------------------------|-----------|-----------|
|                  | X                       | Y         | Z         |
| P                | 1.166596                | -0.168177 | 1.074344  |
| In               | -0.835948               | -0.754163 | -0.143768 |
| Si               | -1.334911               | 1.873234  | 0.012321  |
| H                | -2.318261               | 2.024424  | 1.101312  |
| H                | -0.224678               | 2.823950  | 0.184068  |
| H                | -1.983254               | 2.157253  | -1.286055 |
| Si               | 2.682431                | 0.339247  | -0.483269 |
| H                | 2.505285                | -0.352548 | -1.779816 |
| H                | 2.564619                | 1.803555  | -0.683256 |
| H                | 4.053547                | 0.045253  | -0.013502 |

-----  
Energy = -1114.032710 hartree  
ZPVE = -699066.665854 kcal/mol  
Number of imaginary frequency (1)  
-----

Imaginary frequency - -205.5336  
-----

|     |       |       |       |
|-----|-------|-------|-------|
| -1  | -0.05 | 0.12  | -0.01 |
| -2  | -0.02 | -0.04 | -0.02 |
| -3  | 0.12  | 0.01  | 0.06  |
| -4  | 0.53  | 0.03  | 0.42  |
| -5  | 0.15  | 0.07  | -0.47 |
| -6  | -0.39 | -0.12 | 0.28  |
| -7  | 0.01  | 0.02  | 0.02  |
| -8  | 0.04  | -0.04 | 0.04  |
| -9  | 0.05  | 0.01  | -0.05 |
| -10 | -0.02 | -0.01 | 0.09  |

-----  
-----  
In-P(SiH3)2  
-----

| Atomic<br>Number | Coordinates (Angstroms) |           |           |
|------------------|-------------------------|-----------|-----------|
|                  | X                       | Y         | Z         |
| Si               | 1.741221                | -1.677694 | -0.271621 |
| H                | 1.391301                | -1.616177 | -1.724122 |
| H                | 3.227313                | -1.731725 | -0.181763 |
| H                | 1.195067                | -2.961166 | 0.256556  |
| Si               | 1.739806                | 1.678386  | -0.271585 |
| H                | 1.200313                | 2.961991  | 0.263427  |

|    |           |           |           |
|----|-----------|-----------|-----------|
| H  | 3.226719  | 1.727727  | -0.189518 |
| H  | 1.382055  | 1.622051  | -1.722659 |
| In | -1.514907 | -0.000268 | -0.071161 |
| P  | 0.924885  | 0.000050  | 0.959325  |

-----  
Energy = -1114.114601 hartree  
ZPVE = -699118.053273 kcal/mol  
Number of imaginary frequency (0)  
-----  
-----

B3LYP/LANL2DZ+dp

-----  
F2In-P  
-----

| Atomic<br>Number | Coordinates (Angstroms) |           |          |
|------------------|-------------------------|-----------|----------|
|                  | X                       | Y         | Z        |
| P                | -0.006609               | -2.247811 | 0.000000 |
| In               | 0.000000                | 0.236883  | 0.000000 |
| F                | 1.581954                | 1.219794  | 0.000000 |
| F                | -1.570939               | 1.236862  | 0.000000 |

-----  
Energy = -208.138334 hartree  
ZPVE = -130608.885968 kcal/mol  
Number of imaginary frequency (0)  
-----  
-----

F2In-P (TS1)

| Atomic<br>Number | Coordinates (Angstroms) |           |           |
|------------------|-------------------------|-----------|-----------|
|                  | X                       | Y         | Z         |
| P                | 1.014296                | -1.875170 | 0.000000  |
| In               | 0.000000                | 0.323724  | -0.000000 |
| F                | -0.131852               | 2.164789  | -0.000000 |
| F                | -1.558641               | -0.802001 | 0.000000  |

-----  
Energy = -208.132179 hartree  
ZPVE = -130605.023644 kcal/mol  
Number of imaginary frequency (1)  
-----  
-----

Imaginary frequency - -113.5721

-----  
-1 0.54 0.06 -0.00  
-2 -0.12 -0.11 0.00  
-3 0.32 -0.06 -0.00  
-----

-4 -0.47 0.60 -0.00

---

---

F-In-P-F

---

| Atomic<br>Number | Coordinates (Angstroms) |           |          |
|------------------|-------------------------|-----------|----------|
|                  | X                       | Y         | Z        |
| P                | 0.781243                | -1.753608 | 0.000000 |
| In               | 0.000000                | 0.560793  | 0.000000 |
| F                | -0.541978               | 2.334760  | 0.000000 |
| F                | -0.760093               | -2.465284 | 0.000000 |

---

Energy = -208.156488 hartree

ZPVE = -130620.277784 kcal/mol

Number of imaginary frequency (0)

---

---

In-PF2 (TS2)

---

| Atomic<br>Number | Coordinates (Angstroms) |             |             |
|------------------|-------------------------|-------------|-------------|
|                  | X                       | Y           | Z           |
| P                | 1.49519352              | 0.53712528  | -0.15776102 |
| F                | 2.38744452              | -0.79609572 | 0.23572298  |
| F                | -0.99843600             | 1.57054900  | 0.18678700  |
| In               | -0.83161700             | -0.35206500 | -0.02240000 |

---

Energy = -208.120679 hartree

ZPVE = -130597.807279 kcal/mol

Number of imaginary frequency (1)

---

---

Imaginary frequency - -136.6004

---

---

-1 0.03 0.19 -0.25

-2 -0.16 0.23 0.35

-3 0.77 0.04 0.28

-4 -0.11 -0.10 -0.04

---

---

In-PF2

---

| Atomic<br>Number | Coordinates (Angstroms) |           |           |
|------------------|-------------------------|-----------|-----------|
|                  | X                       | Y         | Z         |
| P                | -1.598758               | -0.000003 | -0.634571 |
| F                | -1.698933               | 1.262965  | 0.509972  |

---

|    |           |           |          |
|----|-----------|-----------|----------|
| F  | -1.698927 | -1.262962 | 0.509976 |
| In | 1.113512  | 0.000001  | 0.006919 |

-----  
Energy = -208.170457 hartree  
ZPVE = -130629.043472 kcal/mol  
Number of imaginary frequency (0)  
-----

(OH)2In-P

| Atomic<br>Number | Coordinates (Angstroms) |           |          |
|------------------|-------------------------|-----------|----------|
|                  | X                       | Y         | Z        |
| P                | -2.272751               | 0.013004  | 0.000000 |
| In               | 0.223547                | 0.000485  | 0.000000 |
| O                | 1.359374                | 1.555918  | 0.000000 |
| H                | 0.991847                | 2.449204  | 0.000000 |
| O                | 1.144827                | -1.681693 | 0.000000 |
| H                | 2.112029                | -1.661843 | 0.000000 |

-----  
Energy = -160.032875 hartree  
ZPVE = -100422.229391 kcal/mol  
Number of imaginary frequency (0)  
-----

(OH)2In-P (TS1)

| Atomic<br>Number | Coordinates (Angstroms) |           |           |
|------------------|-------------------------|-----------|-----------|
|                  | X                       | Y         | Z         |
| P                | 1.965864                | -0.527287 | 0.010451  |
| In               | -0.338713               | -0.146742 | -0.003329 |
| O                | -2.223304               | 0.095723  | 0.030427  |
| H                | -2.812949               | -0.665642 | -0.051255 |
| O                | 0.827674                | 1.620118  | -0.113553 |
| H                | 1.086987                | 2.038567  | 0.722598  |

-----  
Energy = -160.040204 hartree  
ZPVE = -100426.828412 kcal/mol  
Number of imaginary frequency (1)  
-----

Imaginary frequency - -121.1239

-----  
-1 -0.04 0.43 -0.01  
-2 -0.06 -0.11 0.00  
-3 -0.01 0.27 0.00  
-4 -0.15 0.38 -0.01



-5 0.51 -0.28 0.02  
-6 0.41 -0.23 0.02

---

---

HO-In-P-OH

---

| Atomic<br>Number | Coordinates (Angstroms) |           |           |
|------------------|-------------------------|-----------|-----------|
|                  | X                       | Y         | Z         |
| P                | -1.833167               | -0.607866 | 0.049549  |
| O                | -2.470539               | 0.993897  | 0.112001  |
| H                | -2.782549               | 1.257899  | -0.766242 |
| O                | 2.431554                | 0.356732  | -0.000575 |
| H                | 2.911150                | 0.491588  | 0.829314  |
| In               | 0.564914                | -0.070133 | -0.034647 |

---

Energy = -160.065404 hartree  
ZPVE = -100442.641664 kcal/mol  
Number of imaginary frequency (0)

---

---

In-P(OH)2 (TS2)

---

| Atomic<br>Number | Coordinates (Angstroms) |           |           |
|------------------|-------------------------|-----------|-----------|
|                  | X                       | Y         | Z         |
| P                | 1.654027                | 0.682753  | -0.183301 |
| O                | 2.682709                | -0.544473 | 0.285603  |
| H                | 2.444837                | -1.412713 | -0.084856 |
| O                | -1.084786               | 1.416540  | 0.125511  |
| H                | -1.779914               | 1.849175  | 0.640555  |
| In               | -0.780790               | -0.360292 | -0.022349 |

---

Energy = -160.033973 hartree  
ZPVE = -100422.918397 kcal/mol  
Number of imaginary frequency (1)

---

---

Imaginary frequency - -205.4985

---

-1 -0.01 0.09 -0.09  
-2 -0.05 0.15 0.14  
-3 -0.20 0.05 0.46  
-4 0.47 0.05 0.14  
-5 0.60 0.20 0.20  
-6 -0.06 -0.05 -0.02

---

---

In-P(OH)<sub>2</sub>

---

| Atomic<br>Number | Coordinates (Angstroms) |           |           |
|------------------|-------------------------|-----------|-----------|
|                  | X                       | Y         | Z         |
| In               | -0.961784               | 0.000036  | -0.029575 |
| P                | 1.673907                | -0.000044 | -0.584642 |
| O                | 1.148817                | -1.319593 | 0.494275  |
| H                | 1.817320                | -1.559221 | 1.155076  |
| O                | 1.149162                | 1.319490  | 0.494305  |
| H                | 1.817688                | 1.558951  | 1.155122  |

---

Energy = -160.091451 hartree

ZPVE = -100458.986417 kcal/mol

Number of imaginary frequency (0)

---

H<sub>2</sub>In-P

---

| Atomic<br>Number | Coordinates (Angstroms) |           |          |
|------------------|-------------------------|-----------|----------|
|                  | X                       | Y         | Z        |
| P                | -0.000003               | 1.921013  | 0.000000 |
| In               | -0.000003               | -0.532634 | 0.000000 |
| H                | -1.525508               | -1.358285 | 0.000000 |
| H                | 1.525726                | -1.357858 | 0.000000 |

---

Energy = -9.473917 hartree

ZPVE = -5944.977656 kcal/mol

Number of imaginary frequency (0)

---

H<sub>2</sub>In-P (TS1)

---

| Atomic<br>Number | Coordinates (Angstroms) |           |           |
|------------------|-------------------------|-----------|-----------|
|                  | X                       | Y         | Z         |
| P                | -1.817207               | 0.062718  | 0.000004  |
| In               | 0.515935                | -0.002029 | -0.000004 |
| H                | 1.946935                | 0.932099  | 0.000106  |
| H                | 0.030374                | -1.773431 | 0.000058  |

---

Energy = -9.475280 hartree

ZPVE = -5945.832952 kcal/mol

Number of imaginary frequency (1)

---

Imaginary frequency - -504.3146

---

|    |       |       |       |
|----|-------|-------|-------|
| -1 | -0.04 | 0.03  | -0.00 |
| -2 | 0.00  | -0.01 | 0.00  |
| -3 | -0.19 | 0.31  | -0.00 |
| -4 | 0.91  | -0.18 | -0.00 |

---

---

H-In-P-H

---

| Atomic<br>Number | Coordinates (Angstroms) |           |           |
|------------------|-------------------------|-----------|-----------|
|                  | X                       | Y         | Z         |
| H                | 1.724392                | 1.363183  | 0.000013  |
| P                | 1.795117                | -0.087187 | 0.000020  |
| In               | -0.538520               | -0.001518 | -0.000015 |
| H                | -2.263667               | 0.019027  | 0.000424  |

---

Energy = -9.546803 hartree  
ZPVE = -5990.714350 kcal/mol  
Number of imaginary frequency (0)

---

---

In-PH2 (TS2)

---

| Atomic<br>Number | Coordinates (Angstroms) |           |           |
|------------------|-------------------------|-----------|-----------|
|                  | X                       | Y         | Z         |
| In               | 0.611937                | -0.028918 | 0.001416  |
| H                | 0.148437                | 1.728185  | -0.164948 |
| P                | -1.890897               | -0.032936 | -0.083293 |
| H                | -1.769897               | 0.182843  | 1.344960  |

---

Energy = -682.4513 hartree  
ZPVE = -428245.0379 kcal/mol  
Number of imaginary frequency (0)

---

Imaginary frequency - -749.7189

---

|    |       |       |       |
|----|-------|-------|-------|
| -1 | -0.01 | 0.00  | -0.00 |
| -2 | 0.99  | 0.15  | 0.02  |
| -3 | 0.00  | -0.02 | 0.00  |
| -4 | -0.02 | -0.00 | 0.00  |

---

---

In-PH2

---

| Atomic | Coordinates (Angstroms) |  |  |
|--------|-------------------------|--|--|
|--------|-------------------------|--|--|

---

| Number | X         | Y         | Z         |
|--------|-----------|-----------|-----------|
| In     | -0.688157 | 0.000000  | -0.000078 |
| P      | 1.984197  | -0.000002 | -0.117299 |
| H      | 1.978404  | 1.044308  | 0.881658  |
| H      | 1.978343  | -1.044302 | 0.881667  |

Energy = -9.585914 hartree  
 ZPVE = -6015.256894 kcal/mol  
 Number of imaginary frequency (0)

(CH3)2In-P

| Atomic<br>Number | Coordinates (Angstroms) |           |           |
|------------------|-------------------------|-----------|-----------|
|                  | X                       | Y         | Z         |
| C                | -1.282160               | 1.877346  | -0.000052 |
| H                | -1.584823               | 2.118353  | 1.028798  |
| H                | -0.680005               | 2.707664  | -0.387495 |
| H                | -2.188928               | 1.776717  | -0.611786 |
| C                | -1.282386               | -1.877254 | 0.003768  |
| H                | -0.641709               | -2.734506 | 0.240973  |
| H                | -1.729438               | -2.037013 | -0.987624 |
| H                | -2.094505               | -1.823713 | 0.741900  |
| P                | 2.262452                | -0.000361 | 0.001292  |
| In               | -0.196533               | -0.000054 | -0.001356 |

Energy = -88.074058 hartree  
 ZPVE = -55267.352135 kcal/mol  
 Number of imaginary frequency (0)

(CH3)2In-P (TS1)

| Atomic<br>Number | Coordinates (Angstroms) |           |           |
|------------------|-------------------------|-----------|-----------|
|                  | X                       | Y         | Z         |
| In               | 0.183921                | -0.067765 | 0.021076  |
| P                | -2.168381               | -0.405928 | -0.023152 |
| C                | 0.444462                | 2.076041  | -0.023873 |
| H                | -0.480262               | 2.662647  | -0.012987 |
| H                | 1.065971                | 2.355047  | 0.839202  |
| H                | 0.998623                | 2.292195  | -0.947673 |
| C                | 2.024778                | -1.097274 | -0.039099 |
| H                | 1.922672                | -2.190800 | -0.035504 |
| H                | 2.538823                | -0.792527 | -0.961657 |

H 2.652324 -0.789762 0.810981

-----  
Energy = -88.070792 hartree  
ZPVE = -55265.302687 kcal/mol  
Number of imaginary frequency (1)  
-----

Imaginary frequency - -72.5403  
-----

|     |       |       |       |
|-----|-------|-------|-------|
| -1  | 0.02  | -0.10 | 0.00  |
| -2  | 0.01  | 0.28  | 0.00  |
| -3  | -0.35 | -0.02 | -0.01 |
| -4  | -0.42 | -0.13 | -0.00 |
| -5  | -0.37 | 0.05  | -0.02 |
| -6  | -0.39 | 0.04  | -0.03 |
| -7  | 0.16  | 0.17  | 0.01  |
| -8  | 0.29  | 0.16  | -0.02 |
| -9  | 0.14  | 0.25  | 0.02  |
| -10 | 0.11  | 0.22  | 0.03  |

-----

-----  
H3C-In-P-CH3  
-----

| Atomic<br>Number | Coordinates (Angstroms) |           |           |
|------------------|-------------------------|-----------|-----------|
|                  | X                       | Y         | Z         |
| In               | 0.530821                | -0.012964 | -0.000081 |
| P                | -1.718853               | -0.724326 | 0.000101  |
| C                | -2.730566               | 0.908699  | 0.000048  |
| H                | -2.573543               | 1.520925  | -0.895494 |
| H                | -2.572544               | 1.521730  | 0.894862  |
| H                | -3.781390               | 0.587028  | 0.000782  |
| C                | 2.661168                | 0.256098  | 0.000308  |
| H                | 3.149698                | -0.728537 | -0.015532 |
| H                | 2.985111                | 0.791778  | 0.902015  |
| H                | 2.981616                | 0.818450  | -0.886329 |

-----

Energy = -88.129376 hartree  
ZPVE = -55302.064733 kcal/mol  
Number of imaginary frequency (0)  
-----

-----  
In-P(CH3)2 (TS2)  
-----

| Atomic<br>Number | Coordinates (Angstroms) |           |           |
|------------------|-------------------------|-----------|-----------|
|                  | X                       | Y         | Z         |
| P                | -1.564609               | -0.007767 | -0.808057 |

-----

|    |           |           |           |
|----|-----------|-----------|-----------|
| In | 0.813714  | 0.363722  | 0.044492  |
| C  | 0.610530  | -1.992023 | 0.105465  |
| H  | 1.381766  | -2.209763 | 0.851698  |
| H  | 0.922594  | -2.336527 | -0.886908 |
| H  | -0.333807 | -2.459787 | 0.393483  |
| C  | -2.379255 | 0.123880  | 0.882618  |
| H  | -2.934142 | 1.075598  | 0.908692  |
| H  | -1.699692 | 0.107267  | 1.750793  |
| H  | -3.127231 | -0.673821 | 0.994509  |

-----  
Energy = -88.081800 hartree  
ZPVE = -55272.210318 kcal/mol  
Number of imaginary frequency (1)  
-----

Imaginary frequency - -287.8019  
-----

|     |       |       |       |
|-----|-------|-------|-------|
| -1  | -0.04 | 0.16  | -0.04 |
| -2  | -0.04 | -0.05 | -0.01 |
| -3  | 0.39  | 0.05  | 0.15  |
| -4  | 0.52  | -0.27 | -0.08 |
| -5  | 0.02  | -0.02 | 0.05  |
| -6  | 0.32  | 0.32  | 0.36  |
| -7  | -0.00 | 0.02  | 0.00  |
| -8  | -0.02 | -0.00 | 0.19  |
| -9  | -0.01 | -0.18 | 0.00  |
| -10 | -0.01 | -0.00 | -0.16 |

-----  
In-P(CH3)2  
-----

| Atomic<br>Number | Coordinates (Angstroms) |           |           |
|------------------|-------------------------|-----------|-----------|
|                  | X                       | Y         | Z         |
| In               | 1.183019                | -0.000017 | 0.039340  |
| P                | -1.397117               | -0.000018 | -0.678135 |
| C                | -2.008743               | -1.449501 | 0.390886  |
| H                | -1.684364               | -1.410178 | 1.442558  |
| H                | -3.108684               | -1.469751 | 0.380083  |
| H                | -1.661054               | -2.397024 | -0.045582 |
| C                | -2.008541               | 1.449600  | 0.390844  |
| H                | -3.108477               | 1.470589  | 0.379301  |
| H                | -1.684935               | 1.409837  | 1.442752  |
| H                | -1.659965               | 2.397034  | -0.045149 |

-----  
Energy = -88.160116 hartree  
ZPVE = -55321.354391 kcal/mol  
Number of imaginary frequency (0)  
-----

(SiH3)2In-P

| Atomic<br>Number | Coordinates (Angstroms) |           |           |
|------------------|-------------------------|-----------|-----------|
|                  | X                       | Y         | Z         |
| Si               | -1.828241               | -1.725817 | 0.247127  |
| H                | -1.206724               | -2.981706 | -0.251192 |
| H                | -1.621850               | -1.681096 | 1.722605  |
| H                | -3.292552               | -1.804492 | 0.008242  |
| Si               | -1.828038               | 1.725923  | 0.247076  |
| H                | -1.183727               | 2.978809  | -0.228520 |
| H                | -1.648862               | 1.665531  | 1.725087  |
| H                | -3.286349               | 1.824290  | -0.017056 |
| In               | 1.577022                | -0.000026 | 0.069925  |
| P                | -0.923074               | -0.000102 | -0.886957 |

Energy = -19.671909 hartree

ZPVE = -12344.319616 kcal/mol

Number of imaginary frequency (0)

(SiH3)2In-P (TS1)

| Atomic<br>Number | Coordinates (Angstroms) |           |           |
|------------------|-------------------------|-----------|-----------|
|                  | X                       | Y         | Z         |
| P                | -1.552851               | -1.903139 | 0.022551  |
| In               | 0.096092                | -0.176038 | -0.019433 |
| Si               | 2.657636                | 0.216150  | 0.018471  |
| H                | 3.057482                | 0.685484  | 1.369498  |
| H                | 3.385848                | -1.040033 | -0.285237 |
| H                | 3.047826                | 1.248915  | -0.973899 |
| Si               | -1.605026               | 1.881785  | 0.009629  |
| H                | -0.846438               | 3.048811  | -0.512181 |
| H                | -2.827344               | 1.700408  | -0.798804 |
| H                | -1.969683               | 2.158257  | 1.421193  |

Energy = -19.673017 hartree

ZPVE = -12345.014897 kcal/mol

Number of imaginary frequency (1)

Imaginary frequency - -96.7808

-1 -0.12 0.18 0.01  
-2 0.05 -0.04 0.01

-3 0.03 0.06 -0.02  
 -4 0.04 0.03 -0.02  
 -5 0.04 0.07 -0.06  
 -6 -0.01 0.08 -0.01  
 -7 -0.10 -0.10 -0.00  
 -8 0.13 -0.04 0.46  
 -9 0.18 0.09 -0.46  
 -10 -0.54 -0.34 -0.07

H3Si-In-P-SiH3

| Atomic<br>Number | Coordinates (Angstroms) |           |           |
|------------------|-------------------------|-----------|-----------|
|                  | X                       | Y         | Z         |
| In               | 0.000033                | 0.092553  | -0.008173 |
| P                | -0.002109               | 2.519577  | 0.008685  |
| Si               | 2.278935                | -1.196437 | 0.005854  |
| H                | 3.402450                | -0.344743 | -0.458676 |
| H                | 2.571949                | -1.656056 | 1.388860  |
| H                | 2.189209                | -2.388320 | -0.877050 |
| Si               | -2.277233               | -1.199277 | 0.005873  |
| H                | -3.403495               | -0.346201 | -0.449674 |
| H                | -2.564716               | -1.667735 | 1.387181  |
| H                | -2.189193               | -2.385710 | -0.884636 |

Energy = -19.742977 hartree  
 ZPVE = -12388.915497 kcal/mol  
 Number of imaginary frequency (0)

In-P(SiH3)2 (TS2)

| Atomic<br>Number | Coordinates (Angstroms) |           |           |
|------------------|-------------------------|-----------|-----------|
|                  | X                       | Y         | Z         |
| P                | 1.172255                | -0.018739 | 1.181635  |
| In               | -0.750995               | -0.798969 | -0.136949 |
| Si               | -1.453425               | 1.821200  | -0.031282 |
| H                | -2.284985               | 1.926631  | 1.190977  |
| H                | -0.385284               | 2.841993  | -0.018615 |
| H                | -2.298920               | 2.058704  | -1.226940 |
| Si               | 2.559522                | 0.393464  | -0.549824 |
| H                | 2.162698                | -0.207378 | -1.866234 |
| H                | 2.585889                | 1.880653  | -0.704495 |
| H                | 3.950168                | -0.075332 | -0.253232 |



Energy = -19.707693 hartree  
ZPVE = -12366.774434 kcal/mol  
Number of imaginary frequency (1)

-----  
Imaginary frequency - -162.7559  
-----

-1 -0.08 0.20 -0.03  
-2 -0.03 -0.07 -0.02  
-3 0.20 0.05 0.11  
-4 -0.24 -0.17 -0.17  
-5 -0.00 0.25 0.54  
-6 0.59 -0.04 -0.19  
-7 -0.01 0.03 -0.01  
-8 0.01 -0.05 0.02  
-9 0.09 0.01 -0.12  
-10 -0.06 -0.05 0.10  
-----

-----  
In-P(SiH3)2  
-----

| Atomic<br>Number | Coordinates (Angstroms) |           |           |
|------------------|-------------------------|-----------|-----------|
|                  | X                       | Y         | Z         |
| In               | -0.472855               | -0.130569 | -0.007559 |
| P                | 1.673276                | -1.055624 | 0.009686  |
| Si               | 2.929924                | 0.824136  | 0.002228  |
| H                | 4.314438                | 0.363932  | 0.291766  |
| H                | 2.577428                | 1.842370  | 1.031209  |
| H                | 2.965207                | 1.533482  | -1.305215 |
| Si               | -3.019552               | 0.393688  | 0.010720  |
| H                | -3.434093               | 0.938811  | 1.326568  |
| H                | -3.346389               | 1.375598  | -1.051609 |
| H                | -3.751048               | -0.871464 | -0.248877 |

-----

Energy = -19.781815 hartree  
ZPVE = -12413.286730 kcal/mol  
Number of imaginary frequency (0)  
-----  
-----

B97d3/LANL2DZ+dp  
-----

(SiMe(SitBu3)2)2In-P  
-----

| Atomic<br>Number | Coordinates (Angstroms) |   |   |
|------------------|-------------------------|---|---|
|                  | X                       | Y | Z |

---

|    |           |           |           |
|----|-----------|-----------|-----------|
| In | -0.078378 | -0.238833 | -0.686614 |
| P  | -0.269887 | -1.265627 | -2.802888 |
| Si | 2.324314  | -0.166564 | 0.453808  |
| Si | -2.406867 | 0.229725  | 0.494109  |
| Si | 3.932699  | -1.670377 | -1.110465 |
| Si | 3.255276  | 2.145237  | 1.389577  |
| Si | -3.788617 | 1.800077  | -1.200994 |
| Si | -3.346518 | -2.065854 | 1.435725  |
| C  | 2.236011  | -1.179813 | 2.027584  |
| H  | 1.488553  | -1.963466 | 1.939930  |
| H  | 1.951946  | -0.577060 | 2.890618  |
| H  | 3.185678  | -1.659386 | 2.262285  |
| C  | -2.280985 | 1.253194  | 2.031099  |
| H  | -3.253263 | 1.436377  | 2.486748  |
| H  | -1.843811 | 2.224450  | 1.826481  |
| H  | -1.666384 | 0.780342  | 2.796218  |
| C  | -5.651752 | 2.336926  | -0.411511 |
| C  | -2.653905 | 3.601945  | -1.458562 |
| C  | -4.029410 | 0.953597  | -3.104131 |
| C  | -5.064227 | 1.727164  | -3.950916 |
| H  | -6.074408 | 1.637118  | -3.544296 |
| H  | -5.103695 | 1.324339  | -4.970674 |
| H  | -4.831346 | 2.789071  | -4.038191 |
| C  | -2.691623 | 0.947654  | -3.866819 |
| H  | -2.418114 | 1.943963  | -4.221445 |
| H  | -2.746931 | 0.310506  | -4.757532 |
| H  | -1.879339 | 0.576290  | -3.245536 |
| C  | -4.528426 | -0.491237 | -2.988567 |
| H  | -5.521907 | -0.543574 | -2.538492 |
| H  | -3.840738 | -1.085274 | -2.395692 |
| H  | -4.603566 | -0.966660 | -3.973851 |
| C  | -3.184842 | 4.439612  | -2.641770 |
| H  | -4.249280 | 4.660554  | -2.561906 |
| H  | -3.014798 | 3.948465  | -3.602025 |
| H  | -2.661723 | 5.402683  | -2.691834 |
| C  | -1.183890 | 3.261248  | -1.752911 |
| H  | -1.049630 | 2.745627  | -2.704847 |
| H  | -0.765647 | 2.630240  | -0.977719 |
| H  | -0.575536 | 4.172124  | -1.801036 |
| C  | -2.733164 | 4.460324  | -0.180774 |
| H  | -3.717889 | 4.918352  | -0.061533 |
| H  | -2.012960 | 5.286306  | -0.221762 |
| H  | -2.518364 | 3.886373  | 0.719248  |
| C  | -6.264398 | 3.550710  | -1.147311 |
| H  | -7.289377 | 3.731053  | -0.799694 |
| H  | -6.315986 | 3.410573  | -2.227765 |

|   |           |           |           |
|---|-----------|-----------|-----------|
| H | -5.707879 | 4.470514  | -0.952601 |
| C | -6.625029 | 1.151813  | -0.575741 |
| H | -7.516067 | 1.280668  | 0.049187  |
| H | -6.158352 | 0.205233  | -0.310234 |
| H | -6.977101 | 1.055451  | -1.606961 |
| C | -5.536827 | 2.732267  | 1.074461  |
| H | -6.526306 | 2.944046  | 1.497313  |
| H | -4.933582 | 3.630240  | 1.221891  |
| H | -5.092415 | 1.951134  | 1.680486  |
| C | -3.877091 | -3.357544 | -0.086651 |
| C | -1.751975 | -2.945478 | 2.540625  |
| C | -4.936379 | -1.779520 | 2.772373  |
| C | -5.242146 | -2.928131 | -0.661451 |
| H | -5.298144 | -1.850591 | -0.801862 |
| H | -6.065734 | -3.209358 | 0.002493  |
| H | -5.438915 | -3.410123 | -1.625793 |
| C | -2.807656 | -3.352452 | -1.201259 |
| H | -2.522621 | -2.345488 | -1.499573 |
| H | -3.170232 | -3.874544 | -2.094485 |
| H | -1.890062 | -3.861669 | -0.896616 |
| C | -4.029119 | -4.815607 | 0.405966  |
| H | -4.739567 | -4.909338 | 1.229302  |
| H | -3.083052 | -5.245128 | 0.739635  |
| H | -4.392872 | -5.457192 | -0.406269 |
| C | -6.017621 | -0.896996 | 2.137683  |
| H | -6.818752 | -0.671232 | 2.851442  |
| H | -6.489000 | -1.373687 | 1.275901  |
| H | -5.590446 | 0.045880  | 1.819753  |
| C | -4.451466 | -1.090247 | 4.065321  |
| H | -5.300395 | -0.838666 | 4.712827  |
| H | -3.917838 | -0.160450 | 3.862260  |
| H | -3.797335 | -1.734052 | 4.655774  |
| C | -5.614906 | -3.116291 | 3.145885  |
| H | -6.391355 | -2.954122 | 3.903834  |
| H | -4.920324 | -3.848299 | 3.557090  |
| H | -6.112776 | -3.572018 | 2.285799  |
| C | -2.266449 | -4.044008 | 3.493588  |
| H | -2.864213 | -3.634998 | 4.310152  |
| H | -1.425494 | -4.569139 | 3.963286  |
| H | -2.863918 | -4.797501 | 2.975417  |
| C | -0.743928 | -3.594918 | 1.577208  |
| H | -0.420842 | -2.904060 | 0.797794  |
| H | -1.145924 | -4.485662 | 1.092061  |
| H | 0.144236  | -3.928077 | 2.126332  |
| C | -1.028643 | -1.869932 | 3.373327  |
| H | -1.698462 | -1.345657 | 4.057269  |
| H | -0.553678 | -1.125905 | 2.733124  |

|   |           |           |           |
|---|-----------|-----------|-----------|
| H | -0.235339 | -2.319249 | 3.982680  |
| C | 3.111524  | -3.643314 | -1.143904 |
| C | 1.837368  | -3.678542 | -2.005741 |
| H | 1.402736  | -4.685652 | -2.015052 |
| H | 2.028061  | -3.409384 | -3.045269 |
| H | 1.075612  | -3.013018 | -1.601084 |
| C | 4.125786  | -4.654976 | -1.716434 |
| H | 3.655296  | -5.636718 | -1.851874 |
| H | 4.968646  | -4.812473 | -1.039909 |
| H | 4.519719  | -4.355497 | -2.688227 |
| C | 2.729382  | -4.099832 | 0.275785  |
| H | 2.427995  | -5.154407 | 0.277697  |
| H | 1.875814  | -3.535592 | 0.639994  |
| H | 3.537941  | -3.994188 | 0.998381  |
| C | 4.031971  | -0.924351 | -3.068508 |
| C | 5.876291  | -1.832540 | -0.324211 |
| C | 2.648845  | -0.471739 | -3.561801 |
| H | 1.982596  | -1.323507 | -3.689296 |
| H | 2.720876  | 0.011300  | -4.544066 |
| H | 2.185499  | 0.247775  | -2.885140 |
| C | 4.554663  | -1.997931 | -4.049867 |
| H | 3.857109  | -2.832531 | -4.153040 |
| H | 5.523176  | -2.403295 | -3.752169 |
| H | 4.680262  | -1.574073 | -5.053916 |
| C | 4.972621  | 0.288951  | -3.149445 |
| H | 4.638264  | 1.080514  | -2.484770 |
| H | 4.986346  | 0.708694  | -4.162842 |
| H | 6.005153  | 0.033584  | -2.908311 |
| C | 6.857432  | -2.467717 | -1.334043 |
| H | 6.538013  | -3.452892 | -1.674400 |
| H | 7.847546  | -2.592585 | -0.878287 |
| H | 7.000989  | -1.840943 | -2.217471 |
| C | 6.402703  | -0.433771 | 0.006887  |
| H | 5.637915  | 0.133636  | 0.524994  |
| H | 6.687328  | 0.129733  | -0.883914 |
| H | 7.292884  | -0.478365 | 0.644636  |
| C | 5.884302  | -2.685200 | 0.960156  |
| H | 5.686354  | -3.738826 | 0.750943  |
| H | 5.153644  | -2.339784 | 1.691549  |
| H | 6.867497  | -2.649996 | 1.445127  |
| C | 3.762828  | 3.378825  | -0.211262 |
| C | 4.798101  | 1.927076  | 2.813040  |
| C | 1.592127  | 3.039157  | 2.416906  |
| C | 6.167478  | 2.360522  | 2.251719  |
| H | 6.453448  | 1.829986  | 1.348464  |
| H | 6.963613  | 2.178270  | 2.984345  |
| H | 6.182167  | 3.433954  | 2.034999  |

|   |           |           |           |
|---|-----------|-----------|-----------|
| C | 4.576479  | 2.820497  | 4.053115  |
| H | 3.680366  | 2.536463  | 4.607597  |
| H | 4.529633  | 3.879521  | 3.784138  |
| H | 5.410780  | 2.717417  | 4.759271  |
| C | 4.864558  | 0.476487  | 3.323681  |
| H | 3.943673  | 0.193905  | 3.842867  |
| H | 5.684906  | 0.350328  | 4.040521  |
| H | 5.036585  | -0.234942 | 2.519748  |
| C | 5.175628  | 3.068966  | -0.742838 |
| H | 5.372313  | 2.000814  | -0.768200 |
| H | 5.955877  | 3.539752  | -0.139700 |
| H | 5.310469  | 3.460043  | -1.758515 |
| C | 3.756804  | 4.863608  | 0.210420  |
| H | 2.754987  | 5.222589  | 0.454384  |
| H | 4.123221  | 5.498431  | -0.605678 |
| H | 4.405442  | 5.039234  | 1.075446  |
| C | 2.758534  | 3.176703  | -1.367711 |
| H | 1.733978  | 3.408396  | -1.078037 |
| H | 2.769656  | 2.149603  | -1.735591 |
| H | 3.003394  | 3.827341  | -2.215695 |
| C | 1.962043  | 4.325412  | 3.187042  |
| H | 1.077074  | 4.957857  | 3.332493  |
| H | 2.709099  | 4.932995  | 2.677317  |
| H | 2.321884  | 4.116285  | 4.196421  |
| C | 0.530048  | 3.420929  | 1.381130  |
| H | -0.367127 | 3.807470  | 1.875575  |
| H | 0.248853  | 2.552011  | 0.792428  |
| H | 0.864082  | 4.210319  | 0.706673  |
| C | 0.997955  | 2.009925  | 3.398557  |
| H | 0.185366  | 2.456416  | 3.983621  |
| H | 1.740716  | 1.630196  | 4.104564  |
| H | 0.576632  | 1.154777  | 2.868111  |

-----  
Energy = -2005.045286 hartree  
-----

-----  
SiMe(SitBu3)2-In-P-SiMe(SitBu3)2  
-----

| Atomic<br>Number | Coordinates (Angstroms) |           |           |
|------------------|-------------------------|-----------|-----------|
|                  | X                       | Y         | Z         |
| In               | 0.550573                | -0.159407 | 0.448076  |
| P                | -1.434456               | -0.412524 | 1.719169  |
| Si               | -3.603390               | -0.206595 | 0.935248  |
| Si               | 3.060046                | 0.018774  | -0.481423 |
| C                | 2.578642                | 0.072997  | -2.364235 |
| H                | 1.589903                | 0.524818  | -2.529073 |

|    |           |           |           |
|----|-----------|-----------|-----------|
| H  | 2.545269  | -0.938044 | -2.786686 |
| H  | 3.301900  | 0.656095  | -2.949934 |
| H  | -5.834481 | 0.264652  | 2.783711  |
| H  | -4.031665 | 0.976329  | 3.470300  |
| H  | -4.490368 | -0.991786 | 3.680817  |
| Si | -4.032193 | 2.124560  | -0.310813 |
| Si | 3.838430  | 2.374600  | 0.125122  |
| Si | 4.258586  | -2.242809 | -0.210538 |
| C  | -5.956551 | 2.587355  | -0.575873 |
| C  | -3.246441 | 3.432762  | 0.971874  |
| C  | -3.089785 | 2.310556  | -2.089937 |
| C  | -6.591976 | 1.891168  | -1.803538 |
| H  | -7.675205 | 2.119212  | -1.823616 |
| H  | -6.491282 | 0.801623  | -1.774140 |
| H  | -6.171636 | 2.254077  | -2.751869 |
| C  | -6.135464 | 4.112186  | -0.801985 |
| H  | -7.207839 | 4.319301  | -0.982273 |
| H  | -5.582451 | 4.483948  | -1.673044 |
| H  | -5.836043 | 4.705142  | 0.070834  |
| C  | -6.824719 | 2.217986  | 0.651167  |
| H  | -7.861733 | 2.561089  | 0.471180  |
| H  | -6.480374 | 2.694064  | 1.576780  |
| H  | -6.868687 | 1.135777  | 0.825415  |
| C  | -4.203574 | 3.772417  | 2.139333  |
| H  | -5.054159 | 4.392874  | 1.826371  |
| H  | -3.640306 | 4.353194  | 2.893949  |
| H  | -4.594577 | 2.878782  | 2.644411  |
| C  | -2.854401 | 4.772963  | 0.307369  |
| H  | -3.694028 | 5.268356  | -0.197770 |
| H  | -2.033724 | 4.652320  | -0.412637 |
| H  | -2.489169 | 5.455464  | 1.097315  |
| C  | -1.964772 | 2.884015  | 1.624030  |
| H  | -1.241572 | 2.509948  | 0.892729  |
| H  | -2.164148 | 2.049334  | 2.306476  |
| H  | -1.473421 | 3.685198  | 2.208603  |
| C  | -3.366037 | 3.669056  | -2.795678 |
| H  | -4.393526 | 3.718660  | -3.185543 |
| H  | -2.692442 | 3.755388  | -3.670475 |
| H  | -3.196358 | 4.550015  | -2.168310 |
| C  | -3.466369 | 1.243450  | -3.142868 |
| H  | -4.538802 | 1.217250  | -3.369791 |
| H  | -3.147812 | 0.243971  | -2.841791 |
| H  | -2.941894 | 1.477764  | -4.090080 |
| C  | -1.562598 | 2.180399  | -1.884265 |
| H  | -1.145855 | 2.976696  | -1.257520 |
| H  | -1.048989 | 2.228585  | -2.863596 |
| H  | -1.306321 | 1.213887  | -1.420360 |

|   |           |           |           |
|---|-----------|-----------|-----------|
| C | -5.671544 | -2.301422 | -0.980203 |
| C | -6.336573 | -3.652063 | -1.322310 |
| H | -7.186034 | -3.440000 | -1.990475 |
| H | -6.727597 | -4.158108 | -0.430232 |
| H | -5.666134 | -4.352410 | -1.835770 |
| C | -6.695178 | -1.443597 | -0.218810 |
| H | -7.459611 | -1.097886 | -0.926716 |
| H | -6.221104 | -0.562775 | 0.235841  |
| H | -7.189922 | -1.995917 | 0.584401  |
| C | -5.371986 | -1.573727 | -2.296544 |
| H | -6.327923 | -1.336518 | -2.785009 |
| H | -4.778527 | -2.180466 | -2.990634 |
| H | -4.833748 | -0.638162 | -2.114290 |
| C | -4.358142 | -3.564026 | 1.426272  |
| C | -4.382900 | -5.058426 | 1.021724  |
| H | -5.130717 | -5.295380 | 0.254149  |
| H | -4.634762 | -5.628311 | 1.929916  |
| H | -3.408838 | -5.412757 | 0.662781  |
| C | -3.238528 | -3.392362 | 2.469850  |
| H | -2.945648 | -2.345910 | 2.624395  |
| H | -2.328792 | -3.926860 | 2.178958  |
| H | -3.595342 | -3.800263 | 3.425221  |
| C | -5.708857 | -3.270268 | 2.108243  |
| H | -6.547961 | -3.675024 | 1.525902  |
| H | -5.888620 | -2.199637 | 2.265287  |
| H | -5.703516 | -3.766193 | 3.088672  |
| C | -2.736857 | -3.037025 | -1.062683 |
| C | -1.568086 | -3.520644 | -0.189774 |
| H | -1.331737 | -2.806655 | 0.607811  |
| H | -0.689339 | -3.611118 | -0.839984 |
| H | -1.760473 | -4.502525 | 0.259786  |
| C | -3.123961 | -4.216798 | -1.989637 |
| H | -3.821830 | -3.924741 | -2.785712 |
| H | -3.566431 | -5.064586 | -1.450238 |
| H | -2.194829 | -4.571012 | -2.464965 |
| C | -2.202146 | -1.908536 | -1.954649 |
| H | -2.899820 | -1.661494 | -2.758813 |
| H | -1.260009 | -2.242166 | -2.412971 |
| H | -2.007276 | -0.994821 | -1.375047 |
| C | 2.882675  | -3.665177 | -0.498476 |
| C | 1.889315  | -3.749750 | 0.684394  |
| H | 1.431580  | -2.783658 | 0.949738  |
| H | 2.358966  | -4.164332 | 1.586809  |
| H | 1.062740  | -4.428219 | 0.414216  |
| C | 2.054229  | -3.387659 | -1.774378 |
| H | 1.420037  | -2.494734 | -1.668819 |
| H | 1.377749  | -4.240800 | -1.965879 |

|   |          |           |           |
|---|----------|-----------|-----------|
| H | 2.682448 | -3.260439 | -2.669656 |
| C | 3.464626 | -5.106557 | -0.642618 |
| H | 3.807514 | -5.319880 | -1.660760 |
| H | 2.660826 | -5.831860 | -0.420379 |
| H | 4.292024 | -5.321316 | 0.045378  |
| C | 4.935753 | -2.390654 | 1.635556  |
| C | 3.854368 | -1.917920 | 2.640248  |
| H | 3.551993 | -0.877185 | 2.454453  |
| H | 4.267169 | -1.957971 | 3.665237  |
| H | 2.949926 | -2.535244 | 2.630373  |
| C | 5.325646 | -3.846836 | 1.990690  |
| H | 5.792539 | -3.866624 | 2.993333  |
| H | 6.059492 | -4.262579 | 1.281516  |
| H | 4.459198 | -4.521533 | 2.022289  |
| C | 6.188465 | -1.517232 | 1.899033  |
| H | 6.113082 | -0.519818 | 1.454321  |
| H | 7.105963 | -1.984097 | 1.522812  |
| H | 6.316757 | -1.385185 | 2.988627  |
| C | 5.698025 | -2.401062 | -1.605928 |
| C | 5.491768 | -1.384092 | -2.752388 |
| H | 5.484748 | -0.342302 | -2.406113 |
| H | 4.557412 | -1.567362 | -3.300733 |
| H | 6.321592 | -1.482977 | -3.477162 |
| C | 5.742233 | -3.791872 | -2.282189 |
| H | 5.936693 | -4.604347 | -1.568679 |
| H | 6.568144 | -3.796458 | -3.017777 |
| H | 4.820163 | -4.019759 | -2.833090 |
| C | 7.120929 | -2.183109 | -1.039840 |
| H | 7.262392 | -1.203660 | -0.570826 |
| H | 7.844346 | -2.254237 | -1.873316 |
| H | 7.391822 | -2.961229 | -0.310804 |
| C | 3.829291 | 2.611581  | 2.083875  |
| C | 5.647376 | 2.642640  | -0.620242 |
| C | 2.601487 | 3.700231  | -0.687555 |
| C | 5.011468 | 1.877548  | 2.755477  |
| H | 4.929241 | 1.986162  | 3.853216  |
| H | 5.987558 | 2.290544  | 2.464562  |
| H | 5.010477 | 0.804595  | 2.534689  |
| C | 3.940300 | 4.103062  | 2.496478  |
| H | 3.062134 | 4.692835  | 2.203556  |
| H | 4.832776 | 4.591713  | 2.081798  |
| H | 4.017317 | 4.164005  | 3.598207  |
| C | 2.540564 | 2.046300  | 2.730536  |
| H | 1.620139 | 2.501721  | 2.345068  |
| H | 2.565482 | 2.235868  | 3.819867  |
| H | 2.463049 | 0.955206  | 2.603346  |
| C | 6.555202 | 1.438912  | -0.298017 |



|    |           |           |           |
|----|-----------|-----------|-----------|
| H  | 6.807828  | 1.379955  | 0.767850  |
| H  | 7.506481  | 1.526764  | -0.855473 |
| H  | 6.089144  | 0.490067  | -0.588729 |
| C  | 6.362917  | 3.903003  | -0.073507 |
| H  | 5.805557  | 4.830429  | -0.255258 |
| H  | 7.343689  | 4.005267  | -0.575960 |
| H  | 6.562562  | 3.829164  | 1.005129  |
| C  | 5.596476  | 2.761273  | -2.163541 |
| H  | 5.078586  | 3.668622  | -2.502893 |
| H  | 5.110178  | 1.894325  | -2.634991 |
| H  | 6.629342  | 2.809312  | -2.556571 |
| C  | 2.179810  | 3.342195  | -2.132665 |
| H  | 1.643432  | 4.202943  | -2.573443 |
| H  | 1.485692  | 2.494245  | -2.146978 |
| H  | 3.023619  | 3.106314  | -2.792381 |
| C  | 1.288757  | 3.823841  | 0.115084  |
| H  | 0.592853  | 4.493442  | -0.422188 |
| H  | 1.428274  | 4.247738  | 1.117725  |
| H  | 0.778967  | 2.855691  | 0.227489  |
| C  | 3.236879  | 5.115742  | -0.742800 |
| H  | 2.465647  | 5.834327  | -1.079007 |
| H  | 4.063542  | 5.176032  | -1.464172 |
| H  | 3.604605  | 5.467452  | 0.229725  |
| C  | -4.630506 | 0.032077  | 2.987771  |
| Si | -4.118907 | -2.413847 | 0.002805  |

-----  
Energy = -2005.091504 hartree  
-----

-----  
In-P(SiMe(SitBu3)2)2  
-----

| Atomic<br>Number | Coordinates (Angstroms) |           |           |
|------------------|-------------------------|-----------|-----------|
|                  | X                       | Y         | Z         |
| P                | 0.006515                | 0.011152  | -0.457413 |
| In               | -0.126139               | -0.437200 | -2.772409 |
| Si               | -2.268527               | 0.118571  | 0.542529  |
| Si               | 2.297173                | -0.025055 | 0.550075  |
| Si               | -3.907769               | 1.765233  | -0.863056 |
| Si               | -3.123110               | -2.246121 | 1.399223  |
| Si               | 3.924103                | -1.755747 | -0.754340 |
| Si               | 3.140122                | 2.416256  | 1.229699  |
| C                | -2.057066               | 1.096747  | 2.118329  |
| H                | -1.655410               | 2.082098  | 1.896627  |
| H                | -1.374872               | 0.619719  | 2.814931  |
| H                | -2.995481               | 1.235608  | 2.651400  |
| C                | 2.114065                | -0.830094 | 2.228579  |

|   |          |           |           |
|---|----------|-----------|-----------|
| H | 3.057687 | -0.870067 | 2.769806  |
| H | 1.740764 | -1.845876 | 2.142074  |
| H | 1.420393 | -0.287804 | 2.865244  |
| C | 5.704967 | -2.144259 | 0.349291  |
| C | 2.873710 | -3.624695 | -0.846254 |
| C | 4.482401 | -1.215775 | -2.709467 |
| C | 5.603471 | -2.126899 | -3.258319 |
| H | 6.543060 | -1.993048 | -2.719894 |
| H | 5.817683 | -1.885690 | -4.307157 |
| H | 5.343740 | -3.184990 | -3.226767 |
| C | 3.293053 | -1.301711 | -3.675357 |
| H | 2.867117 | -2.303199 | -3.733669 |
| H | 3.593365 | -1.030047 | -4.695104 |
| H | 2.521897 | -0.594615 | -3.381019 |
| C | 4.998623 | 0.228349  | -2.757331 |
| H | 5.894099 | 0.370365  | -2.151136 |
| H | 4.225581 | 0.917843  | -2.425354 |
| H | 5.265463 | 0.518353  | -3.781120 |
| C | 3.538589 | -4.606056 | -1.833863 |
| H | 4.588199 | -4.791510 | -1.605184 |
| H | 3.473611 | -4.255490 | -2.866490 |
| H | 3.030463 | -5.578015 | -1.805404 |
| C | 1.438050 | -3.380081 | -1.329363 |
| H | 1.406910 | -3.064151 | -2.372612 |
| H | 0.937508 | -2.622294 | -0.730859 |
| H | 0.846957 | -4.301202 | -1.267688 |
| C | 2.830096 | -4.284379 | 0.545346  |
| H | 3.800138 | -4.684044 | 0.844806  |
| H | 2.136397 | -5.133738 | 0.551972  |
| H | 2.505423 | -3.592158 | 1.318684  |
| C | 6.361010 | -3.480517 | -0.069854 |
| H | 7.338976 | -3.592202 | 0.415318  |
| H | 6.532406 | -3.549724 | -1.144693 |
| H | 5.771593 | -4.346910 | 0.232768  |
| C | 6.728119 | -1.025369 | 0.064364  |
| H | 7.488922 | -0.975416 | 0.851647  |
| H | 6.254176 | -0.049974 | -0.017892 |
| H | 7.266011 | -1.190691 | -0.873351 |
| C | 5.405585 | -2.236142 | 1.857778  |
| H | 6.320921 | -2.456612 | 2.420318  |
| H | 4.689649 | -3.025470 | 2.094492  |
| H | 5.009320 | -1.309160 | 2.259130  |
| C | 3.559721 | 3.476396  | -0.507853 |
| C | 1.553401 | 3.365409  | 2.266506  |
| C | 4.780361 | 2.453216  | 2.531026  |
| C | 4.986255 | 3.135888  | -0.983499 |
| H | 5.200293 | 2.073493  | -0.884835 |

|   |           |          |           |
|---|-----------|----------|-----------|
| H | 5.746576  | 3.667926 | -0.403669 |
| H | 5.135414  | 3.422622 | -2.030695 |
| C | 2.536949  | 3.110510 | -1.605693 |
| H | 2.508143  | 2.039077 | -1.810064 |
| H | 2.779255  | 3.615995 | -2.547887 |
| H | 1.524247  | 3.414044 | -1.332924 |
| C | 3.508396  | 5.004170 | -0.286186 |
| H | 4.165899  | 5.327725 | 0.524646  |
| H | 2.502268  | 5.361574 | -0.061731 |
| H | 3.830052  | 5.533145 | -1.191890 |
| C | 5.908874  | 1.563749 | 2.009692  |
| H | 6.738464  | 1.504978 | 2.724316  |
| H | 6.330111  | 1.929309 | 1.071618  |
| H | 5.536192  | 0.558967 | 1.861164  |
| C | 4.381025  | 1.938470 | 3.929908  |
| H | 5.266278  | 1.802811 | 4.563328  |
| H | 3.867604  | 0.974855 | 3.882122  |
| H | 3.740368  | 2.649221 | 4.456323  |
| C | 5.364717  | 3.877478 | 2.672830  |
| H | 6.193540  | 3.881682 | 3.391722  |
| H | 4.637615  | 4.605608 | 3.029444  |
| H | 5.768973  | 4.250047 | 1.728679  |
| C | 1.995845  | 4.678565 | 2.938097  |
| H | 2.646617  | 4.496045 | 3.796454  |
| H | 1.126388  | 5.223952 | 3.325774  |
| H | 2.512211  | 5.350559 | 2.250530  |
| C | 0.440407  | 3.679755 | 1.265762  |
| H | 0.160299  | 2.773673 | 0.728092  |
| H | 0.728637  | 4.437145 | 0.536373  |
| H | -0.449341 | 4.065867 | 1.776560  |
| C | 0.976005  | 2.439374 | 3.350754  |
| H | 1.713033  | 2.121008 | 4.087151  |
| H | 0.549114  | 1.547138 | 2.902639  |
| H | 0.168465  | 2.938153 | 3.900232  |
| C | -2.733953 | 3.075528 | -2.085188 |
| C | -2.351051 | 2.397790 | -3.411710 |
| H | -1.510679 | 2.914959 | -3.890206 |
| H | -3.164931 | 2.408146 | -4.139078 |
| H | -2.065518 | 1.363794 | -3.260061 |
| C | -3.490632 | 4.372949 | -2.434574 |
| H | -2.905901 | 4.977945 | -3.138966 |
| H | -3.662456 | 5.005515 | -1.563152 |
| H | -4.453633 | 4.174964 | -2.910714 |
| C | -1.454255 | 3.434638 | -1.328787 |
| H | -0.854596 | 4.161844 | -1.888692 |
| H | -0.831679 | 2.550842 | -1.180207 |
| H | -1.677876 | 3.878441 | -0.358068 |

|   |           |           |           |
|---|-----------|-----------|-----------|
| C | -5.220773 | 0.786690  | -2.156624 |
| C | -4.987792 | 3.000453  | 0.507283  |
| C | -4.461279 | -0.281653 | -2.970263 |
| H | -3.861584 | 0.158082  | -3.770627 |
| H | -5.157603 | -0.975877 | -3.455122 |
| H | -3.788433 | -0.865172 | -2.343883 |
| C | -5.895037 | 1.758336  | -3.153553 |
| H | -5.186780 | 2.213474  | -3.844798 |
| H | -6.432063 | 2.566497  | -2.654764 |
| H | -6.626446 | 1.223741  | -3.772667 |
| C | -6.354969 | 0.121816  | -1.362693 |
| H | -5.955746 | -0.542049 | -0.607594 |
| H | -7.000311 | -0.476658 | -2.016586 |
| H | -6.998408 | 0.853432  | -0.868200 |
| C | -6.101479 | 3.786591  | -0.222102 |
| H | -5.730652 | 4.386049  | -1.051969 |
| H | -6.597816 | 4.478586  | 0.469710  |
| H | -6.880703 | 3.122778  | -0.605138 |
| C | -5.681097 | 2.164523  | 1.597702  |
| H | -4.977272 | 1.563750  | 2.169974  |
| H | -6.446054 | 1.507613  | 1.179112  |
| H | -6.194221 | 2.815361  | 2.316716  |
| C | -4.041045 | 4.005628  | 1.196987  |
| H | -3.590069 | 4.707580  | 0.495701  |
| H | -3.235741 | 3.511217  | 1.737977  |
| H | -4.589385 | 4.610343  | 1.929819  |
| C | -3.445547 | -3.560957 | -0.185552 |
| C | -4.838854 | -2.100757 | 2.598931  |
| C | -1.587455 | -3.048945 | 2.637318  |
| C | -5.925416 | -1.312123 | 1.863094  |
| H | -5.502308 | -0.408123 | 1.441602  |
| H | -6.742813 | -1.025146 | 2.534594  |
| H | -6.377333 | -1.890660 | 1.054365  |
| C | -5.433748 | -3.488001 | 2.927905  |
| H | -4.736942 | -4.138541 | 3.454613  |
| H | -5.765018 | -4.015333 | 2.029958  |
| H | -6.315328 | -3.382304 | 3.572410  |
| C | -4.517966 | -1.371457 | 3.919393  |
| H | -3.880742 | -1.973122 | 4.571231  |
| H | -5.434670 | -1.172991 | 4.488022  |
| H | -4.029653 | -0.409764 | 3.749931  |
| C | -4.817091 | -3.312308 | -0.837005 |
| H | -4.933603 | -2.273595 | -1.126432 |
| H | -5.643001 | -3.576808 | -0.172652 |
| H | -4.937455 | -3.917474 | -1.743652 |
| C | -3.428470 | -5.035247 | 0.276655  |
| H | -2.446618 | -5.353782 | 0.628514  |

|   |           |           |           |
|---|-----------|-----------|-----------|
| H | -3.686722 | -5.702142 | -0.555394 |
| H | -4.149184 | -5.227602 | 1.074852  |
| C | -2.354273 | -3.368680 | -1.254391 |
| H | -1.359219 | -3.567047 | -0.857924 |
| H | -2.356840 | -2.353707 | -1.651478 |
| H | -2.506922 | -4.049502 | -2.100049 |
| C | -2.090496 | -4.236853 | 3.479055  |
| H | -1.252244 | -4.732137 | 3.984673  |
| H | -2.593832 | -4.996848 | 2.879616  |
| H | -2.772410 | -3.912445 | 4.268766  |
| C | -0.427109 | -3.525018 | 1.753809  |
| H | 0.420162  | -3.839563 | 2.373143  |
| H | -0.091090 | -2.718454 | 1.102414  |
| H | -0.686036 | -4.381834 | 1.132002  |
| C | -1.043815 | -1.976842 | 3.597243  |
| H | -0.317263 | -2.409748 | 4.295493  |
| H | -1.819278 | -1.497668 | 4.194723  |
| H | -0.519432 | -1.203004 | 3.043315  |

-----  
Energy = -2004.982581 hartree  
-----

-----  
(SiiPrDis2)2In-P  
-----

| Atomic<br>Number | Coordinates (Angstroms) |           |           |
|------------------|-------------------------|-----------|-----------|
|                  | X                       | Y         | Z         |
| In               | 0.041731                | 0.053082  | -0.650539 |
| Si               | -2.397228               | 0.070981  | 0.522762  |
| C                | -3.364769               | 1.320024  | -0.537471 |
| H                | -3.175347               | 0.995379  | -1.561193 |
| C                | -2.718277               | -1.813293 | 0.287670  |
| H                | -1.699568               | -2.194992 | 0.430267  |
| C                | -1.999528               | 0.761034  | 2.294717  |
| H                | -1.098156               | 1.345892  | 2.105310  |
| C                | -1.617654               | -0.241687 | 3.373099  |
| H                | -2.495972               | -0.643892 | 3.885112  |
| H                | -1.001603               | 0.237407  | 4.143136  |
| H                | -1.051714               | -1.067063 | 2.960526  |
| C                | -3.009301               | 1.721141  | 2.931951  |
| H                | -2.591038               | 2.160981  | 3.845566  |
| H                | -3.933366               | 1.214773  | 3.217082  |
| H                | -3.270027               | 2.552512  | 2.283073  |
| Si               | -3.082736               | -2.425949 | -1.480336 |
| Si               | -3.623815               | -2.770687 | 1.638297  |
| Si               | -5.243353               | 1.338256  | -0.405852 |
| Si               | -2.687161               | 3.120444  | -0.592069 |

|   |           |           |           |
|---|-----------|-----------|-----------|
| C | -1.756085 | -3.752336 | -1.903630 |
| H | -1.642306 | -4.451634 | -1.071601 |
| H | -0.804239 | -3.259702 | -2.111094 |
| H | -2.060813 | -4.306756 | -2.795832 |
| C | -2.977484 | -1.206757 | -2.913799 |
| H | -3.857570 | -0.562212 | -2.959455 |
| H | -2.939708 | -1.759775 | -3.858487 |
| H | -2.083177 | -0.592519 | -2.866220 |
| C | -4.721977 | -3.323753 | -1.813252 |
| H | -4.623263 | -4.395946 | -1.624644 |
| H | -4.989084 | -3.213182 | -2.869502 |
| H | -5.549997 | -2.933392 | -1.223618 |
| C | -4.510829 | -4.383130 | 1.133662  |
| H | -3.870582 | -5.005346 | 0.503594  |
| H | -5.458162 | -4.175609 | 0.633144  |
| H | -4.749304 | -4.957988 | 2.034809  |
| C | -4.907363 | -1.823467 | 2.624160  |
| H | -5.862724 | -1.781685 | 2.095171  |
| H | -4.596070 | -0.805041 | 2.841564  |
| H | -5.089236 | -2.326358 | 3.579417  |
| C | -2.326177 | -3.492742 | 2.869458  |
| H | -2.210987 | -2.857834 | 3.747745  |
| H | -1.362933 | -3.618842 | 2.369841  |
| H | -2.660750 | -4.474122 | 3.219235  |
| C | -1.076128 | 3.493256  | 0.299150  |
| H | -0.718097 | 4.479784  | -0.012149 |
| H | -0.291749 | 2.777116  | 0.077372  |
| H | -1.222364 | 3.536389  | 1.380812  |
| C | -2.401947 | 3.535641  | -2.435350 |
| H | -2.013268 | 4.553312  | -2.532708 |
| H | -3.340290 | 3.463496  | -2.991235 |
| H | -1.679807 | 2.841768  | -2.871370 |
| C | -3.798898 | 4.512368  | 0.081955  |
| H | -4.794847 | 4.530812  | -0.357089 |
| H | -3.328788 | 5.475589  | -0.143966 |
| H | -3.890417 | 4.445436  | 1.168556  |
| C | -5.987543 | 2.339621  | -1.872480 |
| H | -5.752701 | 3.401716  | -1.825325 |
| H | -7.076399 | 2.231111  | -1.864363 |
| H | -5.605184 | 1.935884  | -2.814766 |
| C | -6.087882 | -0.321351 | -0.697240 |
| H | -5.912120 | -0.665637 | -1.718164 |
| H | -7.170050 | -0.216020 | -0.569162 |
| H | -5.745591 | -1.067085 | 0.012069  |
| C | -5.973986 | 1.981000  | 1.193146  |
| H | -5.542214 | 2.928551  | 1.514084  |
| H | -5.845215 | 1.252412  | 1.996993  |

|    |           |           |           |
|----|-----------|-----------|-----------|
| H  | -7.050828 | 2.138259  | 1.071928  |
| P  | 0.074283  | 0.687574  | -2.923912 |
| Si | 2.401814  | -0.144067 | 0.558598  |
| C  | 3.251918  | 1.533763  | 0.332854  |
| H  | 4.281723  | 1.301608  | 0.581894  |
| C  | 3.518185  | -1.675917 | 0.183758  |
| H  | 3.417677  | -2.233641 | 1.117499  |
| C  | 1.911088  | -0.559106 | 2.510028  |
| H  | 1.149441  | 0.182755  | 2.748470  |
| C  | 3.095903  | -0.442041 | 3.474031  |
| H  | 2.748623  | -0.523537 | 4.510186  |
| H  | 3.619828  | 0.507546  | 3.380713  |
| H  | 3.828021  | -1.240172 | 3.313570  |
| C  | 1.297697  | -1.956085 | 2.686674  |
| H  | 0.864130  | -2.052724 | 3.688562  |
| H  | 2.038145  | -2.756234 | 2.599444  |
| H  | 0.511477  | -2.146218 | 1.955288  |
| Si | 5.397642  | -1.519236 | 0.180282  |
| Si | 2.834908  | -2.944716 | -1.023902 |
| Si | 3.428678  | 2.144726  | -1.456275 |
| Si | 2.929339  | 2.959425  | 1.527202  |
| C  | 6.119689  | -3.139696 | 0.968489  |
| H  | 5.472200  | -3.476891 | 1.782126  |
| H  | 7.116437  | -2.934056 | 1.369303  |
| H  | 6.214940  | -3.925078 | 0.217593  |
| C  | 6.169950  | -0.197029 | 1.296082  |
| H  | 5.592102  | -0.047077 | 2.207709  |
| H  | 6.280285  | 0.754186  | 0.770033  |
| H  | 7.177655  | -0.507537 | 1.590987  |
| C  | 6.231927  | -1.348556 | -1.495330 |
| H  | 6.277506  | -0.300603 | -1.803302 |
| H  | 5.724062  | -1.921033 | -2.274415 |
| H  | 7.263277  | -1.710901 | -1.435048 |
| C  | 3.992610  | -4.445346 | -1.300327 |
| H  | 4.208954  | -4.937127 | -0.348535 |
| H  | 4.922859  | -4.147637 | -1.788600 |
| H  | 3.490081  | -5.170501 | -1.948291 |
| C  | 2.409354  | -2.365814 | -2.743982 |
| H  | 3.295569  | -2.009180 | -3.274413 |
| H  | 1.657830  | -1.578175 | -2.739794 |
| H  | 1.998266  | -3.196601 | -3.327193 |
| C  | 1.314454  | -3.793299 | -0.261850 |
| H  | 0.500147  | -3.085446 | -0.116572 |
| H  | 1.573249  | -4.240140 | 0.701845  |
| H  | 0.969136  | -4.593738 | -0.922375 |
| C  | 1.631644  | 2.763420  | 2.863358  |
| H  | 1.425194  | 3.733495  | 3.327838  |

|   |          |           |           |
|---|----------|-----------|-----------|
| H | 1.954570 | 2.098404  | 3.665575  |
| H | 0.695649 | 2.401273  | 2.445543  |
| C | 4.599226 | 3.246074  | 2.465510  |
| H | 4.481443 | 4.072018  | 3.172329  |
| H | 5.383151 | 3.497843  | 1.746176  |
| H | 4.889108 | 2.346346  | 3.011401  |
| C | 2.565148 | 4.675699  | 0.803937  |
| H | 3.359981 | 5.017417  | 0.138172  |
| H | 2.493970 | 5.402105  | 1.620417  |
| H | 1.611547 | 4.687561  | 0.275163  |
| C | 5.103282 | 3.085500  | -1.564594 |
| H | 5.115781 | 3.949062  | -0.897125 |
| H | 5.261830 | 3.432519  | -2.589650 |
| H | 5.920093 | 2.412532  | -1.289270 |
| C | 3.592936 | 0.828075  | -2.783604 |
| H | 2.616952 | 0.469794  | -3.105835 |
| H | 4.089381 | 1.243229  | -3.666562 |
| H | 4.179259 | -0.016450 | -2.442207 |
| C | 2.096519 | 3.304445  | -2.101931 |
| H | 2.351303 | 4.351553  | -1.922997 |
| H | 1.125465 | 3.095173  | -1.654363 |
| H | 1.992769 | 3.187311  | -3.185680 |

-----  
Energy = -1397.153540 hartree  
-----

-----  
(SiiPrDis2)-In-P-(SiiPrDis2)  
-----

| Atomic<br>Number | Coordinates (Angstroms) |           |           |
|------------------|-------------------------|-----------|-----------|
|                  | X                       | Y         | Z         |
| P                | 0.929460                | 0.644053  | -0.382456 |
| Si               | 3.156892                | -0.260068 | -0.573633 |
| C                | 4.094442                | 1.368121  | -0.376179 |
| H                | 3.728074                | 1.820802  | 0.547490  |
| C                | 2.967484                | -1.556862 | 0.771723  |
| H                | 1.947676                | -1.914381 | 0.595354  |
| C                | 3.023470                | -0.869389 | -2.435693 |
| H                | 2.871946                | 0.046412  | -3.014320 |
| C                | 1.782708                | -1.718670 | -2.734478 |
| H                | 1.810091                | -2.118179 | -3.754126 |
| H                | 0.878938                | -1.107647 | -2.668761 |
| H                | 1.661400                | -2.554956 | -2.046670 |
| C                | 4.284736                | -1.505780 | -3.021213 |
| H                | 4.085262                | -1.953475 | -4.001077 |
| H                | 4.716134                | -2.275728 | -2.382644 |
| H                | 5.052314                | -0.747396 | -3.186781 |



|    |          |           |           |
|----|----------|-----------|-----------|
| Si | 2.846467 | -0.898382 | 2.543586  |
| Si | 3.916717 | -3.170862 | 0.644420  |
| Si | 5.960862 | 1.252900  | -0.189883 |
| Si | 3.641062 | 2.685616  | -1.705226 |
| C  | 1.431458 | -1.872909 | 3.424981  |
| H  | 1.160104 | -1.357353 | 4.350761  |
| H  | 1.757396 | -2.882923 | 3.678236  |
| H  | 0.552416 | -1.930512 | 2.780281  |
| C  | 2.340083 | 0.909108  | 2.755123  |
| H  | 3.194322 | 1.575875  | 2.618349  |
| H  | 1.968539 | 1.069306  | 3.772558  |
| H  | 1.546093 | 1.194863  | 2.066125  |
| C  | 4.358807 | -1.129245 | 3.652794  |
| H  | 4.052069 | -1.548878 | 4.616250  |
| H  | 4.832665 | -0.165656 | 3.857477  |
| H  | 5.109430 | -1.794176 | 3.225142  |
| C  | 3.656636 | -4.323628 | 2.159722  |
| H  | 2.591969 | -4.535726 | 2.287883  |
| H  | 4.060445 | -3.892350 | 3.076920  |
| H  | 4.173140 | -5.271474 | 1.978278  |
| C  | 5.766566 | -3.053376 | 0.415504  |
| H  | 6.266133 | -2.732480 | 1.332294  |
| H  | 6.029960 | -2.367253 | -0.386756 |
| H  | 6.175286 | -4.035021 | 0.154494  |
| C  | 3.231100 | -4.288903 | -0.742380 |
| H  | 3.482100 | -3.919027 | -1.735021 |
| H  | 2.144741 | -4.374371 | -0.650054 |
| H  | 3.660211 | -5.291236 | -0.645637 |
| C  | 1.826851 | 2.754395  | -2.247924 |
| H  | 1.700878 | 3.551188  | -2.988437 |
| H  | 1.178849 | 2.992869  | -1.400993 |
| H  | 1.498054 | 1.824076  | -2.713941 |
| C  | 3.903406 | 4.432093  | -0.957952 |
| H  | 3.278741 | 5.155113  | -1.491228 |
| H  | 4.941122 | 4.754671  | -1.054045 |
| H  | 3.616615 | 4.435012  | 0.097260  |
| C  | 4.650878 | 2.584681  | -3.292450 |
| H  | 5.696293 | 2.853019  | -3.121820 |
| H  | 4.250801 | 3.286296  | -4.031377 |
| H  | 4.611038 | 1.583915  | -3.728010 |
| C  | 6.794814 | 2.972325  | -0.050098 |
| H  | 6.832142 | 3.470542  | -1.021222 |
| H  | 7.824162 | 2.846970  | 0.300162  |
| H  | 6.260602 | 3.595952  | 0.671548  |
| C  | 6.437125 | 0.481339  | 1.464248  |
| H  | 6.015780 | 1.065352  | 2.286160  |
| H  | 7.525134 | 0.467536  | 1.579269  |

|    |           |           |           |
|----|-----------|-----------|-----------|
| H  | 6.080337  | -0.541182 | 1.526500  |
| C  | 6.906406  | 0.360238  | -1.534130 |
| H  | 6.733460  | 0.799471  | -2.518429 |
| H  | 6.651425  | -0.697623 | -1.578077 |
| H  | 7.981524  | 0.423124  | -1.335870 |
| In | -0.734238 | -0.776946 | -0.025828 |
| Si | -3.066095 | 0.408175  | -0.406543 |
| C  | -3.539757 | 1.283443  | 1.210588  |
| H  | -4.616881 | 1.446640  | 1.197789  |
| C  | -4.390277 | -0.602502 | -1.358212 |
| H  | -4.359953 | -0.182081 | -2.368442 |
| C  | -2.477111 | 1.764529  | -1.909103 |
| H  | -1.819101 | 2.463478  | -1.390309 |
| C  | -3.672046 | 2.499865  | -2.527312 |
| H  | -3.320902 | 3.349090  | -3.124103 |
| H  | -4.359004 | 2.884130  | -1.775574 |
| H  | -4.248656 | 1.855285  | -3.198401 |
| C  | -1.683531 | 1.085494  | -3.032095 |
| H  | -1.355079 | 1.830879  | -3.765365 |
| H  | -2.286881 | 0.345607  | -3.564895 |
| H  | -0.786478 | 0.589824  | -2.661483 |
| Si | -6.174487 | -0.298982 | -0.858033 |
| Si | -3.953708 | -2.400813 | -1.700874 |
| Si | -3.259514 | 0.231138  | 2.794070  |
| Si | -2.794261 | 3.017228  | 1.491962  |
| C  | -7.398009 | -0.924068 | -2.198828 |
| H  | -6.982766 | -0.760435 | -3.196671 |
| H  | -8.336743 | -0.366697 | -2.120605 |
| H  | -7.632756 | -1.979988 | -2.057484 |
| C  | -6.649411 | 1.544774  | -0.815669 |
| H  | -6.543321 | 1.978396  | -1.813837 |
| H  | -6.056995 | 2.128274  | -0.113971 |
| H  | -7.699451 | 1.639397  | -0.520762 |
| C  | -6.710696 | -1.081545 | 0.751474  |
| H  | -6.262854 | -0.576427 | 1.608109  |
| H  | -6.449431 | -2.142121 | 0.789042  |
| H  | -7.797109 | -1.005968 | 0.863572  |
| C  | -5.313615 | -3.355416 | -2.649915 |
| H  | -5.663161 | -2.780035 | -3.510275 |
| H  | -6.147434 | -3.597283 | -1.987240 |
| H  | -4.899615 | -4.299331 | -3.018717 |
| C  | -3.566949 | -3.502045 | -0.243705 |
| H  | -4.389335 | -3.515923 | 0.474689  |
| H  | -2.649002 | -3.208020 | 0.263389  |
| H  | -3.422250 | -4.532444 | -0.585758 |
| C  | -2.504835 | -2.503892 | -2.941186 |
| H  | -1.601925 | -2.027671 | -2.562915 |

|   |           |           |           |
|---|-----------|-----------|-----------|
| H | -2.788882 | -2.021291 | -3.880743 |
| H | -2.275503 | -3.553236 | -3.150133 |
| C | -3.501628 | 4.322488  | 0.304539  |
| H | -3.396503 | 5.317731  | 0.748414  |
| H | -4.565090 | 4.145735  | 0.126574  |
| H | -2.959398 | 4.338662  | -0.641474 |
| C | -3.311739 | 3.763513  | 3.180476  |
| H | -3.034663 | 4.822055  | 3.207129  |
| H | -2.807969 | 3.270209  | 4.013013  |
| H | -4.395395 | 3.689808  | 3.306194  |
| C | -0.926317 | 3.125395  | 1.405642  |
| H | -0.606008 | 4.162670  | 1.547289  |
| H | -0.545548 | 2.796846  | 0.438178  |
| H | -0.448833 | 2.529413  | 2.184303  |
| C | -4.626249 | 0.703101  | 4.058229  |
| H | -4.382813 | 1.631166  | 4.577262  |
| H | -4.719075 | -0.088094 | 4.808110  |
| H | -5.586423 | 0.817689  | 3.548477  |
| C | -3.484632 | -1.626242 | 2.600875  |
| H | -2.599987 | -2.083899 | 2.158169  |
| H | -3.623360 | -2.088427 | 3.583724  |
| H | -4.361549 | -1.860010 | 2.002233  |
| C | -1.603635 | 0.442624  | 3.663402  |
| H | -1.499252 | 1.427369  | 4.123295  |
| H | -0.772195 | 0.292663  | 2.973353  |
| H | -1.508786 | -0.299033 | 4.463157  |

-----  
Energy = -1397.217405 hartree  
-----

-----  
In-P(Sii PrDis2)2  
-----

| Atomic<br>Number | Coordinates (Angstroms) |           |           |
|------------------|-------------------------|-----------|-----------|
|                  | X                       | Y         | Z         |
| P                | -0.213874               | -0.514884 | -0.062785 |
| Si               | 2.346711                | -0.081942 | -0.687284 |
| C                | 2.928944                | 1.689417  | -0.325545 |
| H                | 2.427926                | 1.993262  | 0.596398  |
| C                | 2.987247                | -1.581157 | 0.389244  |
| H                | 2.146751                | -2.263235 | 0.261767  |
| C                | 2.147178                | -0.528134 | -2.603669 |
| H                | 1.421564                | 0.207519  | -2.940946 |
| C                | 1.483918                | -1.866250 | -2.936654 |
| H                | 2.154677                | -2.544848 | -3.468289 |
| H                | 0.654081                | -1.696794 | -3.632407 |
| H                | 1.088000                | -2.384413 | -2.064449 |

|    |          |           |           |
|----|----------|-----------|-----------|
| C  | 3.399304 | -0.323547 | -3.457094 |
| H  | 3.201275 | -0.581174 | -4.503793 |
| H  | 4.238871 | -0.932186 | -3.116160 |
| H  | 3.719919 | 0.718366  | -3.448696 |
| Si | 3.006489 | -1.322643 | 2.271208  |
| Si | 4.376873 | -2.679938 | -0.234594 |
| Si | 4.804883 | 2.013156  | 0.021251  |
| Si | 2.485264 | 3.089814  | -1.613587 |
| C  | 1.945632 | -2.695040 | 3.114329  |
| H  | 2.240045 | -2.788348 | 4.163999  |
| H  | 2.096766 | -3.656991 | 2.620144  |
| H  | 0.889321 | -2.426747 | 3.089954  |
| C  | 2.259469 | 0.290913  | 2.863998  |
| H  | 2.943409 | 1.134491  | 2.774334  |
| H  | 1.973085 | 0.215098  | 3.917388  |
| H  | 1.368445 | 0.513469  | 2.282071  |
| C  | 4.663695 | -1.508585 | 3.186883  |
| H  | 4.651318 | -2.413223 | 3.803155  |
| H  | 4.814397 | -0.659754 | 3.860769  |
| H  | 5.526509 | -1.577876 | 2.525644  |
| C  | 4.780786 | -4.109446 | 0.996394  |
| H  | 3.858930 | -4.600284 | 1.317656  |
| H  | 5.334900 | -3.754858 | 1.865268  |
| H  | 5.405591 | -4.850272 | 0.487598  |
| C  | 6.008357 | -1.878982 | -0.658430 |
| H  | 6.550460 | -1.550766 | 0.230143  |
| H  | 5.870938 | -1.032709 | -1.329520 |
| H  | 6.653362 | -2.598677 | -1.173603 |
| C  | 3.883779 | -3.710789 | -1.757800 |
| H  | 4.042601 | -3.146413 | -2.676140 |
| H  | 2.845502 | -4.041390 | -1.681501 |
| H  | 4.516186 | -4.602301 | -1.819383 |
| C  | 1.123249 | 2.699527  | -2.804880 |
| H  | 0.520704 | 3.581894  | -3.038464 |
| H  | 0.502860 | 1.964987  | -2.316854 |
| H  | 1.493381 | 2.290142  | -3.748643 |
| C  | 1.865938 | 4.611861  | -0.633920 |
| H  | 0.788358 | 4.531357  | -0.472400 |
| H  | 2.056562 | 5.524034  | -1.206726 |
| H  | 2.362909 | 4.693667  | 0.334376  |
| C  | 3.832105 | 3.738901  | -2.785038 |
| H  | 4.617809 | 4.291537  | -2.268952 |
| H  | 3.373638 | 4.435961  | -3.495192 |
| H  | 4.277270 | 2.931081  | -3.369424 |
| C  | 5.062140 | 3.834999  | 0.644260  |
| H  | 4.853359 | 4.576435  | -0.126212 |
| H  | 6.103697 | 3.954986  | 0.957729  |

|    |           |           |           |
|----|-----------|-----------|-----------|
| H  | 4.414121  | 4.011879  | 1.507368  |
| C  | 5.592322  | 1.124455  | 1.468570  |
| H  | 5.074331  | 1.324701  | 2.406426  |
| H  | 6.626884  | 1.460317  | 1.597079  |
| H  | 5.629258  | 0.064398  | 1.267343  |
| C  | 5.972766  | 1.737803  | -1.427845 |
| H  | 6.265082  | 2.683743  | -1.890652 |
| H  | 5.534053  | 1.097779  | -2.192343 |
| H  | 6.894445  | 1.258701  | -1.082077 |
| In | -0.537262 | -2.791426 | 0.507331  |
| Si | -2.438361 | 0.643266  | -0.351344 |
| C  | -2.850073 | 1.419658  | 1.339042  |
| H  | -3.894224 | 1.726048  | 1.294220  |
| C  | -3.931617 | -0.286326 | -1.219415 |
| H  | -3.994677 | 0.279723  | -2.151486 |
| C  | -2.065598 | 1.984373  | -1.840916 |
| H  | -1.233619 | 2.564690  | -1.441448 |
| C  | -3.232721 | 2.928912  | -2.152385 |
| H  | -2.872455 | 3.789933  | -2.726601 |
| H  | -3.721988 | 3.304228  | -1.255964 |
| H  | -4.002557 | 2.443744  | -2.761151 |
| C  | -1.684485 | 1.272290  | -3.155107 |
| H  | -1.314691 | 1.997122  | -3.888232 |
| H  | -2.538402 | 0.777063  | -3.627243 |
| H  | -0.917036 | 0.510383  | -3.002305 |
| Si | -5.685320 | 0.067819  | -0.593350 |
| Si | -3.679516 | -1.993447 | -1.922837 |
| Si | -2.790351 | 0.206455  | 2.810620  |
| Si | -1.931815 | 3.014926  | 1.780363  |
| C  | -7.026421 | -0.538086 | -1.834215 |
| H  | -6.771022 | -0.234231 | -2.852028 |
| H  | -7.987876 | -0.086334 | -1.570665 |
| H  | -7.139647 | -1.622387 | -1.772404 |
| C  | -6.102109 | 1.923816  | -0.512150 |
| H  | -6.038993 | 2.366667  | -1.509363 |
| H  | -5.455224 | 2.479604  | 0.164907  |
| H  | -7.131390 | 2.045539  | -0.159438 |
| C  | -6.202227 | -0.702371 | 1.027673  |
| H  | -5.794921 | -0.153362 | 1.875949  |
| H  | -5.906311 | -1.751197 | 1.092460  |
| H  | -7.292420 | -0.667283 | 1.126368  |
| C  | -4.808639 | -2.252702 | -3.482458 |
| H  | -4.888373 | -1.317869 | -4.042993 |
| H  | -5.797249 | -2.608895 | -3.190991 |
| H  | -4.354810 | -3.012941 | -4.125567 |
| C  | -4.104537 | -3.431878 | -0.806392 |
| H  | -5.155018 | -3.397091 | -0.504408 |

|   |           |           |           |
|---|-----------|-----------|-----------|
| H | -3.495015 | -3.465913 | 0.095406  |
| H | -3.950865 | -4.376069 | -1.339113 |
| C | -1.997178 | -2.231163 | -2.731332 |
| H | -1.210345 | -1.750425 | -2.159876 |
| H | -1.989912 | -1.790006 | -3.732940 |
| H | -1.762154 | -3.294689 | -2.833270 |
| C | -2.375338 | 4.492181  | 0.679676  |
| H | -2.028022 | 5.417149  | 1.151663  |
| H | -3.458560 | 4.569215  | 0.556178  |
| H | -1.889170 | 4.431903  | -0.294383 |
| C | -2.419279 | 3.686605  | 3.506195  |
| H | -2.040797 | 4.707366  | 3.618757  |
| H | -1.979833 | 3.081994  | 4.302362  |
| H | -3.507192 | 3.710366  | 3.610930  |
| C | -0.077743 | 2.868802  | 1.790774  |
| H | 0.277237  | 2.372446  | 2.693573  |
| H | 0.385026  | 3.859131  | 1.777306  |
| H | 0.261285  | 2.312885  | 0.917904  |
| C | -4.036142 | 0.822597  | 4.147598  |
| H | -3.559834 | 1.529804  | 4.828517  |
| H | -4.386475 | -0.027873 | 4.739856  |
| H | -4.896185 | 1.298806  | 3.669750  |
| C | -3.380829 | -1.551951 | 2.473951  |
| H | -2.677971 | -2.278451 | 2.891681  |
| H | -4.347037 | -1.739613 | 2.950006  |
| H | -3.479789 | -1.738562 | 1.410665  |
| C | -1.148876 | 0.008510  | 3.683766  |
| H | -0.770034 | 0.945261  | 4.095399  |
| H | -0.421054 | -0.406598 | 2.990418  |
| H | -1.246091 | -0.694486 | 4.517444  |

-----  
Energy = -1397.170904 hartree  
-----

-----  
(NHC)2In-P  
-----

| Atomic<br>Number | Coordinates (Angstroms) |           |           |
|------------------|-------------------------|-----------|-----------|
|                  | X                       | Y         | Z         |
| In               | 0.464814                | -0.334450 | -0.756791 |
| P                | 1.533457                | -0.930987 | -2.774220 |
| C                | 1.657134                | -0.181279 | 1.126197  |
| N                | 1.316882                | -1.110030 | 2.267535  |
| C                | 2.514065                | -1.524589 | 2.853370  |
| C                | 3.564870                | -1.119893 | 2.134208  |
| N                | 3.151082                | -0.351514 | 1.056322  |

S62

|   |           |           |           |
|---|-----------|-----------|-----------|
| H | 1.464874  | 0.850934  | 1.423138  |
| H | 2.512719  | -2.091787 | 3.772654  |
| H | 4.613904  | -1.302566 | 2.311754  |
| C | 0.187310  | -0.894271 | 3.076635  |
| C | -2.107613 | -0.528296 | 4.711724  |
| C | -0.801853 | -1.918281 | 3.178896  |
| C | 0.045818  | 0.273319  | 3.892502  |
| C | -1.120317 | 0.441705  | 4.670261  |
| C | -1.936197 | -1.702044 | 3.994764  |
| H | -1.252289 | 1.332807  | 5.280224  |
| H | -2.699555 | -2.473223 | 4.085827  |
| H | -2.990082 | -0.387327 | 5.329186  |
| C | 3.866833  | -0.244007 | -0.142860 |
| C | 5.239816  | 0.015625  | -2.613705 |
| C | 4.191391  | -1.401727 | -0.927833 |
| C | 4.319460  | 1.030759  | -0.589265 |
| C | 4.964926  | 1.133606  | -1.842233 |
| C | 4.882731  | -1.239388 | -2.146786 |
| H | 5.291793  | 2.104198  | -2.211883 |
| H | 5.153419  | -2.101071 | -2.751397 |
| H | 5.757925  | 0.119070  | -3.562895 |
| C | -0.715059 | -3.323655 | 2.571137  |
| H | -1.739185 | -3.724991 | 2.557904  |
| C | 0.098648  | -4.259940 | 3.470275  |
| H | 1.157052  | -3.988145 | 3.492422  |
| H | 0.031646  | -5.292760 | 3.110778  |
| H | -0.271951 | -4.243286 | 4.501157  |
| C | -0.255378 | -3.439478 | 1.122999  |
| H | -0.440573 | -4.452229 | 0.746417  |
| H | 0.813238  | -3.254359 | 1.000493  |
| H | -0.814091 | -2.749543 | 0.490439  |
| C | 1.144850  | 1.325775  | 4.061093  |
| H | 2.028650  | 1.036693  | 3.496784  |
| C | 1.624925  | 1.422471  | 5.516305  |
| H | 0.850781  | 1.812721  | 6.185137  |
| H | 2.488842  | 2.092460  | 5.589284  |
| H | 1.931200  | 0.440032  | 5.892679  |
| C | 0.716232  | 2.702009  | 3.544695  |
| H | -0.108940 | 3.121963  | 4.129118  |
| H | 0.393649  | 2.647392  | 2.500559  |
| H | 1.551451  | 3.408978  | 3.597157  |
| C | 3.865005  | -2.833738 | -0.486592 |
| H | 3.084769  | -2.812259 | 0.276125  |
| C | 5.110099  | -3.504747 | 0.106994  |
| H | 4.858223  | -4.488114 | 0.518772  |
| H | 5.550713  | -2.908886 | 0.911491  |
| H | 5.887601  | -3.650540 | -0.651713 |

|   |           |           |           |
|---|-----------|-----------|-----------|
| C | 3.295495  | -3.730503 | -1.596067 |
| H | 4.036511  | -3.968908 | -2.365715 |
| H | 2.440631  | -3.261695 | -2.085900 |
| H | 2.953035  | -4.682352 | -1.174118 |
| C | 4.244573  | 2.340133  | 0.199406  |
| H | 5.064987  | 2.971462  | -0.174177 |
| C | 4.521573  | 2.248493  | 1.700086  |
| H | 4.729432  | 3.245390  | 2.105982  |
| H | 5.392447  | 1.618095  | 1.908074  |
| H | 3.668168  | 1.861854  | 2.256539  |
| C | 2.960623  | 3.110576  | -0.090938 |
| H | 2.071319  | 2.573029  | 0.241011  |
| H | 2.856245  | 3.296522  | -1.164945 |
| H | 2.970465  | 4.082323  | 0.414488  |
| C | -1.600604 | 0.518716  | -0.881224 |
| N | -1.704129 | 1.845774  | -1.597583 |
| C | -2.769459 | 1.780061  | -2.489922 |
| C | -3.231364 | 0.528173  | -2.584983 |
| N | -2.519492 | -0.312729 | -1.741991 |
| H | -3.147234 | 2.667181  | -2.975385 |
| H | -4.061011 | 0.157515  | -3.169027 |
| C | -2.985806 | -1.572791 | -1.344017 |
| C | -3.808495 | -4.166077 | -0.552809 |
| C | -3.975127 | -1.740245 | -0.337224 |
| C | -2.493924 | -2.731477 | -2.016748 |
| C | -2.915324 | -4.010411 | -1.601865 |
| C | -4.343125 | -3.043086 | 0.061185  |
| H | -2.563412 | -4.904224 | -2.110249 |
| H | -5.090442 | -3.191331 | 0.837590  |
| H | -4.122496 | -5.159523 | -0.244947 |
| C | -1.239831 | 3.054830  | -1.065405 |
| C | -0.188538 | 5.451879  | 0.060633  |
| C | -0.260028 | 3.822537  | -1.767338 |
| C | -1.768247 | 3.596656  | 0.145429  |
| C | -1.200933 | 4.763990  | 0.703310  |
| C | 0.247642  | 5.005044  | -1.174761 |
| H | -1.583642 | 5.172935  | 1.635942  |
| H | 0.998455  | 5.599724  | -1.693148 |
| H | 0.221882  | 6.359447  | 0.493542  |
| C | -1.585891 | -2.619940 | -3.243079 |
| H | -1.121216 | -1.630173 | -3.266653 |
| C | -2.408400 | -2.764494 | -4.527265 |
| H | -3.207361 | -2.016514 | -4.571650 |
| H | -2.875801 | -3.752956 | -4.599585 |
| H | -1.773780 | -2.628214 | -5.409576 |
| C | -0.431535 | -3.629765 | -3.237209 |
| H | 0.097268  | -3.616405 | -2.279046 |



|   |           |           |           |
|---|-----------|-----------|-----------|
| H | 0.288857  | -3.388761 | -4.026715 |
| H | -0.773333 | -4.654220 | -3.417948 |
| C | -4.747542 | -0.571115 | 0.264914  |
| H | -4.370396 | 0.367412  | -0.137443 |
| C | -6.230294 | -0.622836 | -0.123839 |
| H | -6.740230 | -1.491136 | 0.306943  |
| H | -6.347893 | -0.670707 | -1.212229 |
| H | -6.750613 | 0.274343  | 0.229214  |
| C | -4.591352 | -0.492451 | 1.782215  |
| H | -5.133973 | 0.370791  | 2.181330  |
| H | -3.536743 | -0.378317 | 2.044285  |
| H | -4.972919 | -1.382616 | 2.292253  |
| C | 0.273479  | 3.557070  | -3.180895 |
| H | 1.188434  | 4.158739  | -3.288038 |
| C | 0.739785  | 2.143349  | -3.499105 |
| H | 1.250906  | 2.121212  | -4.468751 |
| H | -0.082136 | 1.428138  | -3.563369 |
| H | 1.458922  | 1.805072  | -2.749323 |
| C | -0.681940 | 4.080656  | -4.256869 |
| H | -0.991337 | 5.110675  | -4.048311 |
| H | -1.582716 | 3.470791  | -4.343499 |
| H | -0.192648 | 4.074117  | -5.237423 |
| C | -3.026760 | 3.055819  | 0.822001  |
| H | -3.403338 | 2.199447  | 0.268088  |
| C | -4.168688 | 4.080922  | 0.795224  |
| H | -3.948297 | 4.964081  | 1.404069  |
| H | -5.091167 | 3.635270  | 1.183766  |
| H | -4.366170 | 4.418990  | -0.228218 |
| C | -2.754621 | 2.592844  | 2.252172  |
| H | -2.408429 | 3.406586  | 2.897196  |
| H | -1.990766 | 1.811430  | 2.255884  |
| H | -3.660594 | 2.183464  | 2.708856  |
| H | -1.990076 | 0.579206  | 0.138027  |

-----  
Energy = -2328.523706 hartree  
-----

-----  
NHC-In-P-NHC  
-----

| Atomic<br>Number | Coordinates (Angstroms) |           |           |
|------------------|-------------------------|-----------|-----------|
|                  | X                       | Y         | Z         |
| In               | -0.581777               | -0.537376 | 1.189166  |
| P                | 0.788892                | 1.202161  | 1.087367  |
| C                | 2.561442                | 0.809729  | 0.598770  |
| N                | 2.656466                | -0.590768 | 0.115159  |
| C                | 2.362835                | -0.526434 | -1.252606 |

S65

|   |           |           |           |
|---|-----------|-----------|-----------|
| C | 2.484094  | 0.729628  | -1.713346 |
| N | 2.823488  | 1.554808  | -0.661930 |
| H | 3.285337  | 1.071570  | 1.370136  |
| H | 2.067363  | -1.404445 | -1.799454 |
| H | 2.354543  | 1.108235  | -2.715307 |
| C | 2.864058  | -1.767066 | 0.860474  |
| C | 2.546011  | -4.349996 | 2.048637  |
| C | 3.332746  | -2.959788 | 0.210108  |
| C | 2.552252  | -1.904495 | 2.257245  |
| C | 2.364599  | -3.202473 | 2.799074  |
| C | 3.074006  | -4.228668 | 0.781676  |
| H | 2.089727  | -3.345414 | 3.840445  |
| H | 3.365241  | -5.136408 | 0.255770  |
| H | 2.384070  | -5.329530 | 2.488172  |
| C | 2.994562  | 2.941206  | -0.647220 |
| C | 3.356979  | 5.746993  | -0.371701 |
| C | 1.900378  | 3.838199  | -0.816494 |
| C | 4.295064  | 3.492868  | -0.434279 |
| C | 4.440311  | 4.889761  | -0.275585 |
| C | 2.107043  | 5.227342  | -0.663893 |
| H | 5.422126  | 5.326215  | -0.101282 |
| H | 1.282563  | 5.925306  | -0.790590 |
| H | 3.493311  | 6.818723  | -0.259666 |
| C | 4.346179  | -3.031636 | -0.952101 |
| H | 5.027019  | -3.845318 | -0.650535 |
| C | 5.316002  | -1.857871 | -1.107665 |
| H | 4.867093  | -0.996852 | -1.600362 |
| H | 6.169648  | -2.156126 | -1.727799 |
| H | 5.712198  | -1.540715 | -0.137676 |
| C | 3.776015  | -3.495906 | -2.294332 |
| H | 3.088286  | -4.338137 | -2.170142 |
| H | 4.588458  | -3.830716 | -2.949916 |
| H | 3.252386  | -2.705272 | -2.832808 |
| C | 2.537716  | -0.751328 | 3.270107  |
| H | 2.114966  | 0.135491  | 2.816364  |
| C | 3.978202  | -0.440501 | 3.698169  |
| H | 4.421361  | -1.281214 | 4.244391  |
| H | 4.007413  | 0.437848  | 4.351973  |
| H | 4.621642  | -0.236239 | 2.836390  |
| C | 1.673981  | -0.949252 | 4.529562  |
| H | 2.107565  | -1.679621 | 5.221036  |
| H | 0.660156  | -1.273860 | 4.274091  |
| H | 1.590146  | -0.004756 | 5.079842  |
| C | 0.502187  | 3.381748  | -1.226360 |
| H | 0.432150  | 2.293886  | -1.191655 |
| C | 0.220640  | 3.796503  | -2.675786 |
| H | -0.755082 | 3.429119  | -3.003535 |

|   |           |           |           |
|---|-----------|-----------|-----------|
| H | 0.976724  | 3.386082  | -3.354417 |
| H | 0.218806  | 4.885020  | -2.799395 |
| C | -0.591906 | 3.908564  | -0.289878 |
| H | -0.745445 | 4.987724  | -0.392516 |
| H | -0.353820 | 3.702830  | 0.758858  |
| H | -1.545049 | 3.423625  | -0.516695 |
| C | 5.611765  | 2.709439  | -0.475301 |
| H | 6.422591  | 3.435369  | -0.317305 |
| C | 5.886113  | 2.111127  | -1.857634 |
| H | 6.894317  | 1.684115  | -1.897356 |
| H | 5.817927  | 2.878326  | -2.636970 |
| H | 5.184883  | 1.315320  | -2.114775 |
| C | 5.806004  | 1.681742  | 0.633730  |
| H | 5.260635  | 0.758564  | 0.437220  |
| H | 5.496591  | 2.078339  | 1.606092  |
| H | 6.863702  | 1.403948  | 0.709487  |
| C | -2.328367 | -0.422218 | -0.193926 |
| N | -2.674543 | -1.753757 | -0.790704 |
| C | -4.039108 | -1.959689 | -0.679367 |
| C | -4.588320 | -1.001217 | 0.078451  |
| N | -3.619058 | -0.096515 | 0.503132  |
| H | -4.529693 | -2.772485 | -1.191183 |
| H | -5.628045 | -0.851556 | 0.329742  |
| C | -3.910142 | 1.243927  | 0.818931  |
| C | -4.415116 | 3.929349  | 1.553625  |
| C | -4.345835 | 2.186580  | -0.156249 |
| C | -3.802483 | 1.658210  | 2.180230  |
| C | -4.048771 | 3.002639  | 2.518691  |
| C | -4.578278 | 3.521614  | 0.236664  |
| H | -3.986220 | 3.335193  | 3.551689  |
| H | -4.915487 | 4.258926  | -0.488454 |
| H | -4.609988 | 4.960977  | 1.833532  |
| C | -1.800544 | -2.482825 | -1.601362 |
| C | 0.128744  | -3.861438 | -3.173572 |
| C | -1.319843 | -3.766680 | -1.197550 |
| C | -1.365647 | -1.964564 | -2.860588 |
| C | -0.386464 | -2.653888 | -3.607031 |
| C | -0.348376 | -4.417298 | -1.997753 |
| H | -0.037575 | -2.259797 | -4.558820 |
| H | 0.040764  | -5.391058 | -1.704364 |
| H | 0.872281  | -4.386253 | -3.766117 |
| C | -3.528925 | 0.657563  | 3.304925  |
| H | -3.159155 | -0.282390 | 2.885542  |
| C | -4.827188 | 0.325669  | 4.048179  |
| H | -5.585770 | -0.061949 | 3.358979  |
| H | -5.248175 | 1.206534  | 4.545478  |
| H | -4.649415 | -0.437558 | 4.813503  |

|   |           |           |           |
|---|-----------|-----------|-----------|
| C | -2.454094 | 1.133446  | 4.290882  |
| H | -1.546340 | 1.450842  | 3.767226  |
| H | -2.180947 | 0.322298  | 4.975099  |
| H | -2.796802 | 1.972317  | 4.905531  |
| C | -4.648934 | 1.809708  | -1.605179 |
| H | -4.346162 | 0.781506  | -1.796514 |
| C | -6.154002 | 1.876518  | -1.887231 |
| H | -6.542264 | 2.897375  | -1.803420 |
| H | -6.713383 | 1.248132  | -1.185391 |
| H | -6.371265 | 1.521203  | -2.900464 |
| C | -3.874620 | 2.661961  | -2.613651 |
| H | -4.040782 | 2.295723  | -3.632760 |
| H | -2.801988 | 2.610004  | -2.411866 |
| H | -4.172395 | 3.714985  | -2.590824 |
| C | -1.791676 | -4.598967 | 0.002462  |
| H | -1.024960 | -5.371900 | 0.163519  |
| C | -1.885823 | -3.918909 | 1.364168  |
| H | -2.109827 | -4.659575 | 2.141139  |
| H | -2.672033 | -3.165305 | 1.417494  |
| H | -0.929830 | -3.462111 | 1.630873  |
| C | -3.073553 | -5.373514 | -0.320270 |
| H | -2.985694 | -5.910351 | -1.271307 |
| H | -3.947296 | -4.723530 | -0.383281 |
| H | -3.278412 | -6.115613 | 0.459646  |
| C | -1.988286 | -0.728983 | -3.509245 |
| H | -2.780347 | -0.335460 | -2.873684 |
| C | -2.680165 | -1.070163 | -4.836161 |
| H | -1.969865 | -1.391565 | -5.605096 |
| H | -3.211895 | -0.194772 | -5.225395 |
| H | -3.413262 | -1.872922 | -4.698966 |
| C | -0.959988 | 0.385834  | -3.710574 |
| H | -0.162405 | 0.096070  | -4.402670 |
| H | -0.491816 | 0.658587  | -2.760478 |
| H | -1.439088 | 1.280443  | -4.121129 |
| H | -2.107640 | 0.324060  | -0.961399 |

-----  
Energy = -2328.549429 hartree  
-----

-----  
In-P(NHC)2  
-----

| Atomic<br>Number | Coordinates (Angstroms) |           |           |
|------------------|-------------------------|-----------|-----------|
|                  | X                       | Y         | Z         |
| P                | 0.557399                | -0.327236 | -0.324177 |
| In               | 1.899929                | -1.441416 | -1.912210 |
| C                | 1.265069                | 0.425630  | 1.218924  |

|   |           |           |           |
|---|-----------|-----------|-----------|
| N | 0.686464  | -0.134777 | 2.498248  |
| C | 1.715143  | -0.286491 | 3.424179  |
| C | 2.899387  | -0.080437 | 2.846568  |
| N | 2.739395  | 0.236943  | 1.504879  |
| H | 1.056526  | 1.494085  | 1.167065  |
| H | 1.502833  | -0.522827 | 4.456710  |
| H | 3.876665  | -0.118783 | 3.300901  |
| C | -0.606190 | 0.159810  | 2.940430  |
| C | -3.233851 | 0.685056  | 3.867044  |
| C | -1.535556 | -0.904090 | 3.112821  |
| C | -0.985186 | 1.472120  | 3.359045  |
| C | -2.307428 | 1.710898  | 3.784852  |
| C | -2.844001 | -0.608460 | 3.555682  |
| H | -2.616022 | 2.707834  | 4.091427  |
| H | -3.568626 | -1.411446 | 3.681847  |
| H | -4.244714 | 0.884280  | 4.210708  |
| C | 3.789279  | 0.230170  | 0.587155  |
| C | 5.860359  | 0.138387  | -1.367027 |
| C | 4.526896  | -0.985990 | 0.335264  |
| C | 4.220814  | 1.415976  | -0.071368 |
| C | 5.211447  | 1.328320  | -1.079144 |
| C | 5.549402  | -0.996639 | -0.637825 |
| H | 5.522937  | 2.222238  | -1.617817 |
| H | 6.121854  | -1.899227 | -0.834303 |
| H | 6.640400  | 0.108565  | -2.122412 |
| C | -1.224838 | -2.401031 | 2.989683  |
| H | -2.152330 | -2.880178 | 2.649402  |
| C | -0.903932 | -2.980453 | 4.375457  |
| H | 0.007630  | -2.539839 | 4.792775  |
| H | -0.758576 | -4.064857 | 4.319034  |
| H | -1.716213 | -2.794921 | 5.086805  |
| C | -0.161124 | -2.861347 | 1.996867  |
| H | -0.247160 | -3.942111 | 1.835772  |
| H | 0.856694  | -2.691697 | 2.355599  |
| H | -0.279903 | -2.371689 | 1.031433  |
| C | 0.013274  | 2.622419  | 3.498048  |
| H | 1.014695  | 2.265533  | 3.270655  |
| C | 0.100346  | 3.138701  | 4.941367  |
| H | -0.823700 | 3.629480  | 5.264181  |
| H | 0.910072  | 3.870750  | 5.036497  |
| H | 0.307765  | 2.318783  | 5.638044  |
| C | -0.278105 | 3.771224  | 2.534598  |
| H | -1.230194 | 4.263020  | 2.756768  |
| H | -0.312305 | 3.409699  | 1.503977  |
| H | 0.507629  | 4.532349  | 2.593222  |
| C | 4.292210  | -2.289681 | 1.117969  |
| H | 3.311584  | -2.256218 | 1.598995  |

|   |           |           |           |
|---|-----------|-----------|-----------|
| C | 5.371270  | -2.455532 | 2.198429  |
| H | 5.139403  | -3.308483 | 2.845586  |
| H | 5.462420  | -1.569899 | 2.832590  |
| H | 6.357588  | -2.634079 | 1.754426  |
| C | 4.265374  | -3.570714 | 0.266301  |
| H | 5.241620  | -3.805555 | -0.169824 |
| H | 3.542750  | -3.502899 | -0.548301 |
| H | 3.977544  | -4.427925 | 0.886134  |
| C | 3.824821  | 2.849671  | 0.287605  |
| H | 4.669674  | 3.486698  | -0.016644 |
| C | 3.690256  | 3.155120  | 1.777925  |
| H | 3.677241  | 4.238668  | 1.943148  |
| H | 4.530397  | 2.743353  | 2.347112  |
| H | 2.765607  | 2.767021  | 2.196250  |
| C | 2.633591  | 3.349020  | -0.516985 |
| H | 1.748961  | 2.729662  | -0.372823 |
| H | 2.868766  | 3.345447  | -1.586306 |
| H | 2.377656  | 4.377144  | -0.239863 |
| C | -1.231239 | 0.048789  | -0.839090 |
| N | -1.302902 | 1.129450  | -1.914649 |
| C | -1.980841 | 0.595916  | -3.006045 |
| C | -2.259453 | -0.699417 | -2.830830 |
| N | -1.816893 | -1.150276 | -1.592320 |
| H | -2.277922 | 1.218872  | -3.835004 |
| H | -2.822057 | -1.352668 | -3.482328 |
| C | -2.496636 | -2.198254 | -0.931806 |
| C | -3.713562 | -4.351674 | 0.484953  |
| C | -3.760424 | -2.034665 | -0.292083 |
| C | -1.971244 | -3.526176 | -1.003195 |
| C | -2.572241 | -4.568906 | -0.265306 |
| C | -4.320144 | -3.107686 | 0.440072  |
| H | -2.172492 | -5.578855 | -0.304780 |
| H | -5.280380 | -3.000094 | 0.937759  |
| H | -4.171458 | -5.167042 | 1.037160  |
| C | -1.206629 | 2.519287  | -1.719268 |
| C | -0.917207 | 5.345976  | -1.284946 |
| C | -0.274349 | 3.303709  | -2.479323 |
| C | -2.100459 | 3.247049  | -0.861882 |
| C | -1.908436 | 4.634415  | -0.642045 |
| C | -0.141086 | 4.694530  | -2.219405 |
| H | -2.570745 | 5.199213  | 0.007935  |
| H | 0.580357  | 5.289851  | -2.777964 |
| H | -0.796914 | 6.410667  | -1.110303 |
| C | -0.856415 | -3.905465 | -1.975440 |
| H | -0.393357 | -2.998537 | -2.360363 |
| C | -1.440680 | -4.634748 | -3.192761 |
| H | -2.214002 | -4.030410 | -3.679919 |

|   |           |           |           |
|---|-----------|-----------|-----------|
| H | -1.893149 | -5.593364 | -2.915681 |
| H | -0.658787 | -4.836318 | -3.933037 |
| C | 0.258409  | -4.748709 | -1.344001 |
| H | 0.670666  | -4.261806 | -0.455587 |
| H | 1.077730  | -4.892691 | -2.057236 |
| H | -0.086349 | -5.745144 | -1.049729 |
| C | -4.659326 | -0.825434 | -0.536612 |
| H | -4.068636 | -0.024660 | -0.970526 |
| C | -5.742719 | -1.170710 | -1.568189 |
| H | -6.434092 | -1.933186 | -1.192419 |
| H | -5.300931 | -1.551629 | -2.495372 |
| H | -6.331560 | -0.282057 | -1.820490 |
| C | -5.311556 | -0.260494 | 0.727529  |
| H | -5.908704 | 0.625838  | 0.491227  |
| H | -4.549479 | 0.036232  | 1.448157  |
| H | -5.984343 | -0.970929 | 1.216693  |
| C | 0.605010  | 2.852390  | -3.652074 |
| H | 1.461336  | 3.543268  | -3.679293 |
| C | 1.264472  | 1.492465  | -3.561956 |
| H | 2.064362  | 1.407053  | -4.307062 |
| H | 0.568535  | 0.677154  | -3.761278 |
| H | 1.717566  | 1.364203  | -2.577524 |
| C | -0.109200 | 3.033046  | -4.996149 |
| H | -0.490560 | 4.053774  | -5.110434 |
| H | -0.953792 | 2.351239  | -5.111856 |
| H | 0.580956  | 2.844605  | -5.826115 |
| C | -3.408398 | 2.660749  | -0.326138 |
| H | -3.238524 | 1.624608  | -0.063803 |
| C | -4.487496 | 2.751178  | -1.415207 |
| H | -4.674834 | 3.791870  | -1.704788 |
| H | -5.435940 | 2.331090  | -1.066662 |
| H | -4.200430 | 2.209232  | -2.320348 |
| C | -3.959468 | 3.302735  | 0.957046  |
| H | -4.391193 | 4.292833  | 0.774082  |
| H | -3.180636 | 3.407680  | 1.713843  |
| H | -4.758750 | 2.685722  | 1.381017  |
| H | -1.813085 | 0.281625  | 0.052843  |

---

Energy = -2328.516866 hartree

---
